# Supplementary material for: Immune modulatory oncolytic virus for osteosarcoma therapy
Source: Research Square preprint supplement (doi:10.21203/rs.3.rs-9488970/v1), 2026-05-04
Supplement: Supplementary file 1 [file e3fa0688ffbad0f7fb35d0c6.pdf]

Figure 1

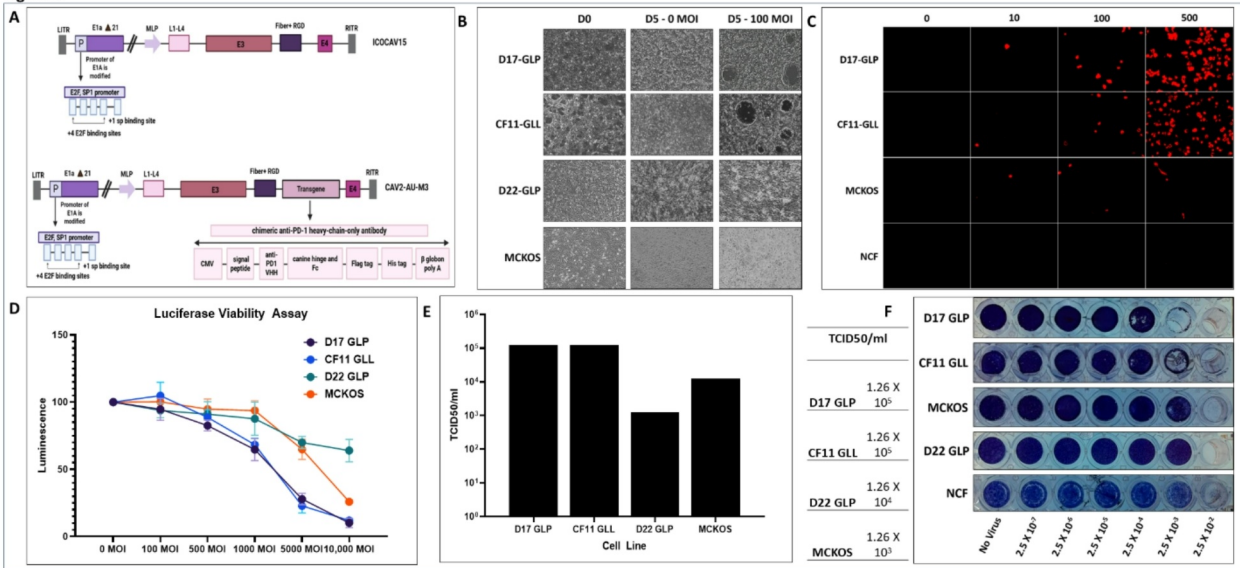

# Figure 2

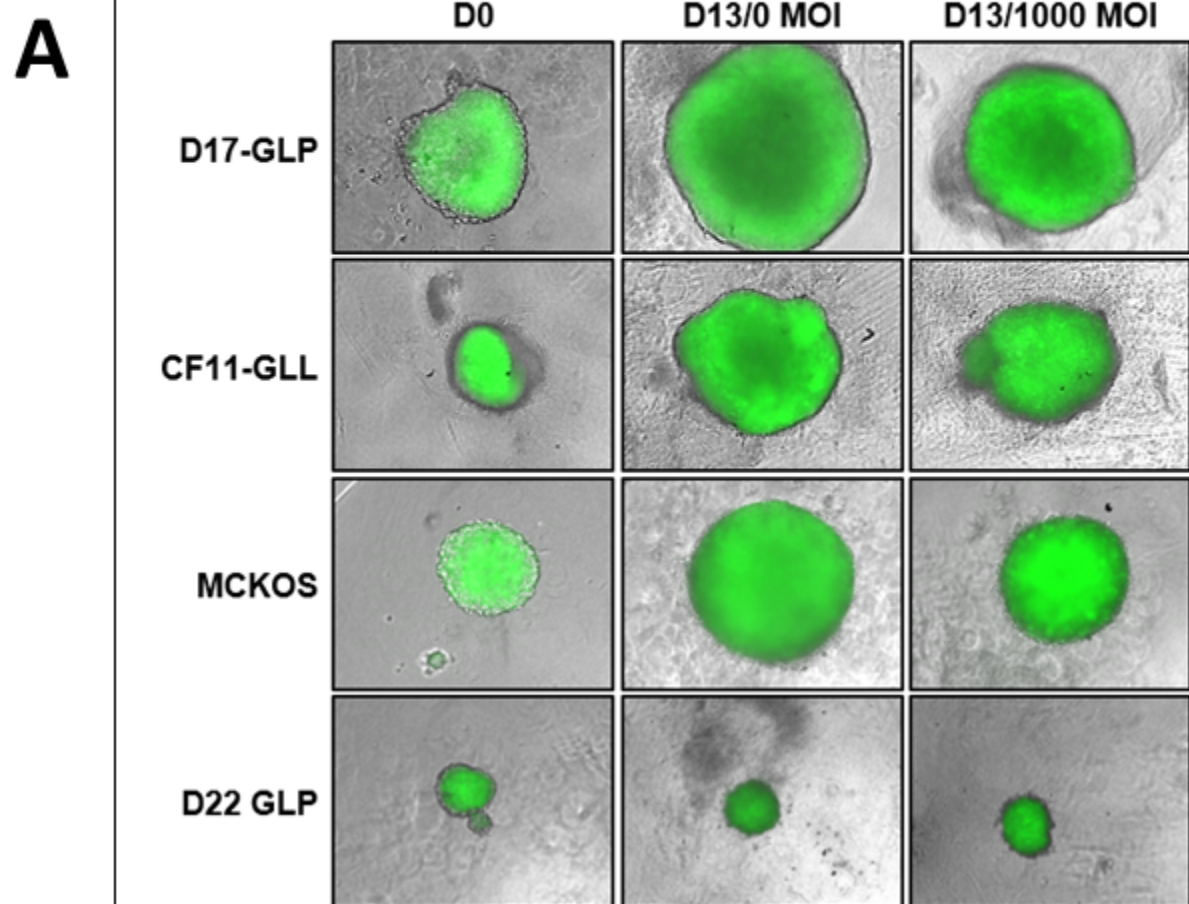

**B**

|          | MOI  | Day 0 | Day 7  | Day 13  |
|----------|------|-------|--------|---------|
| D17 GLP  | 0    | 100   | 354.90 | 469.41  |
|          | 1000 | 100   | 128.73 | 177.30  |
| CF11 GLL | 0    | 100   | 692.32 | 1431.17 |
|          | 1000 | 100   | 392.50 | 564.24  |
| MCKOS    | 0    | 100   | 169.99 | 293.26  |
|          | 1000 | 100   | 176.14 | 250.20  |
| D22 GLP  | 0    | 100   | 68.34  | 89.79   |
|          | 1000 | 100   | 148.79 | 128.40  |

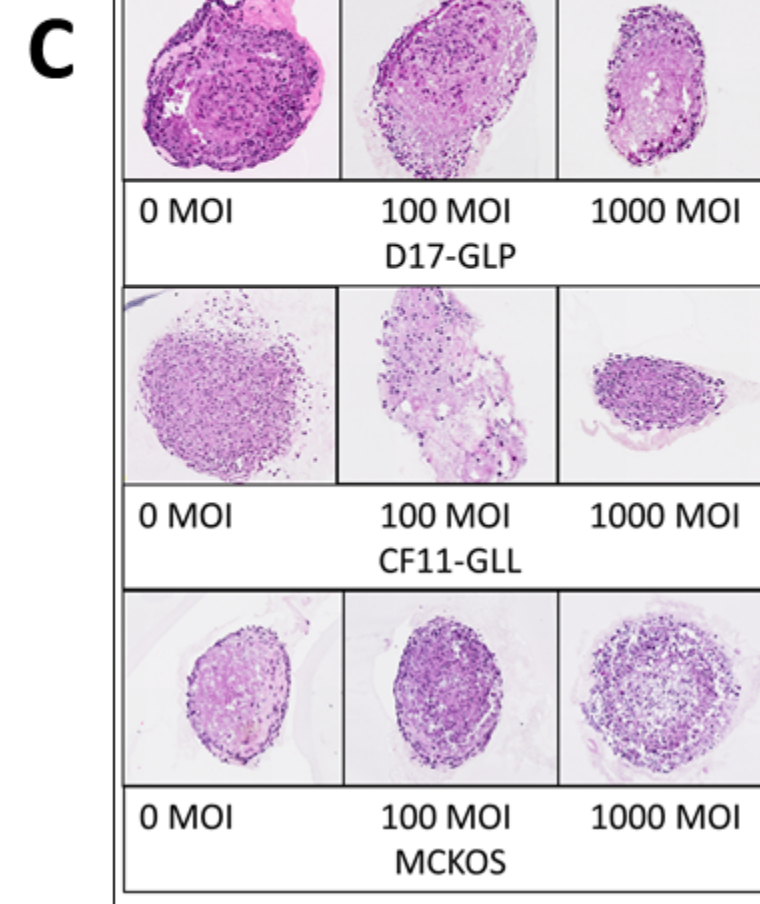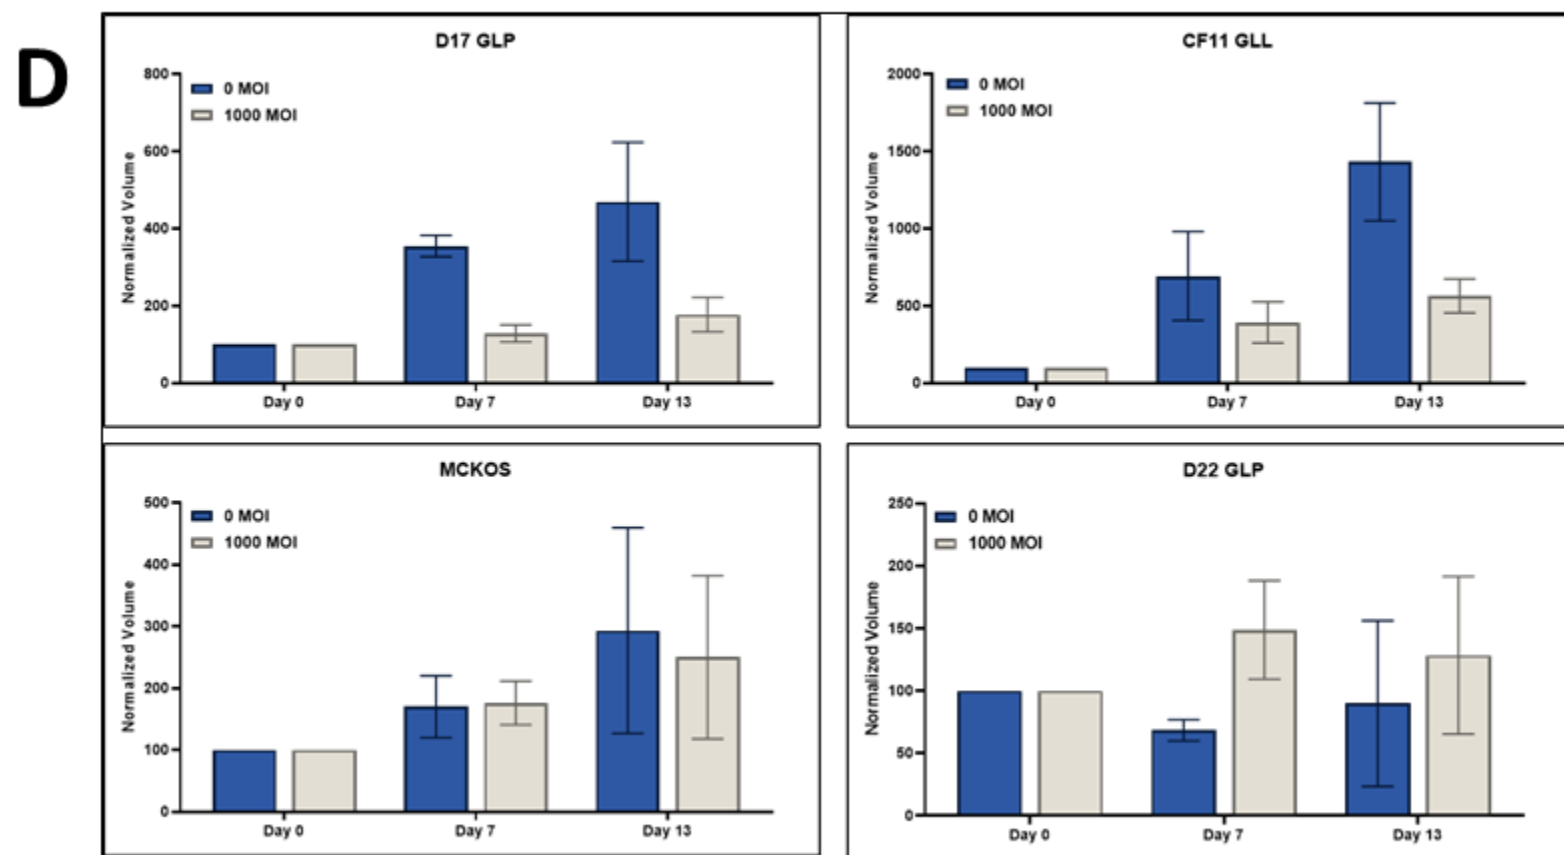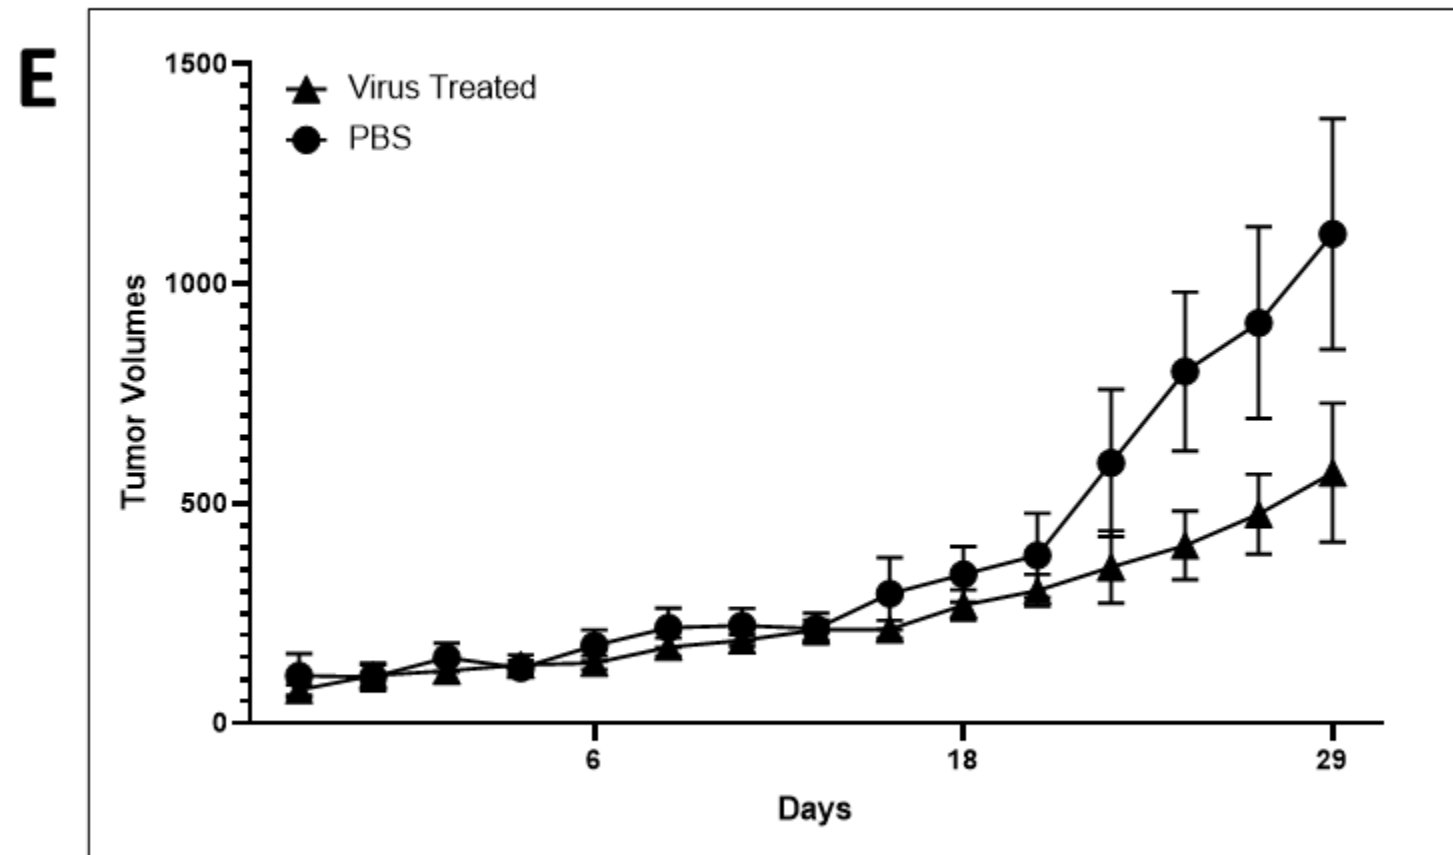

# Figure 3

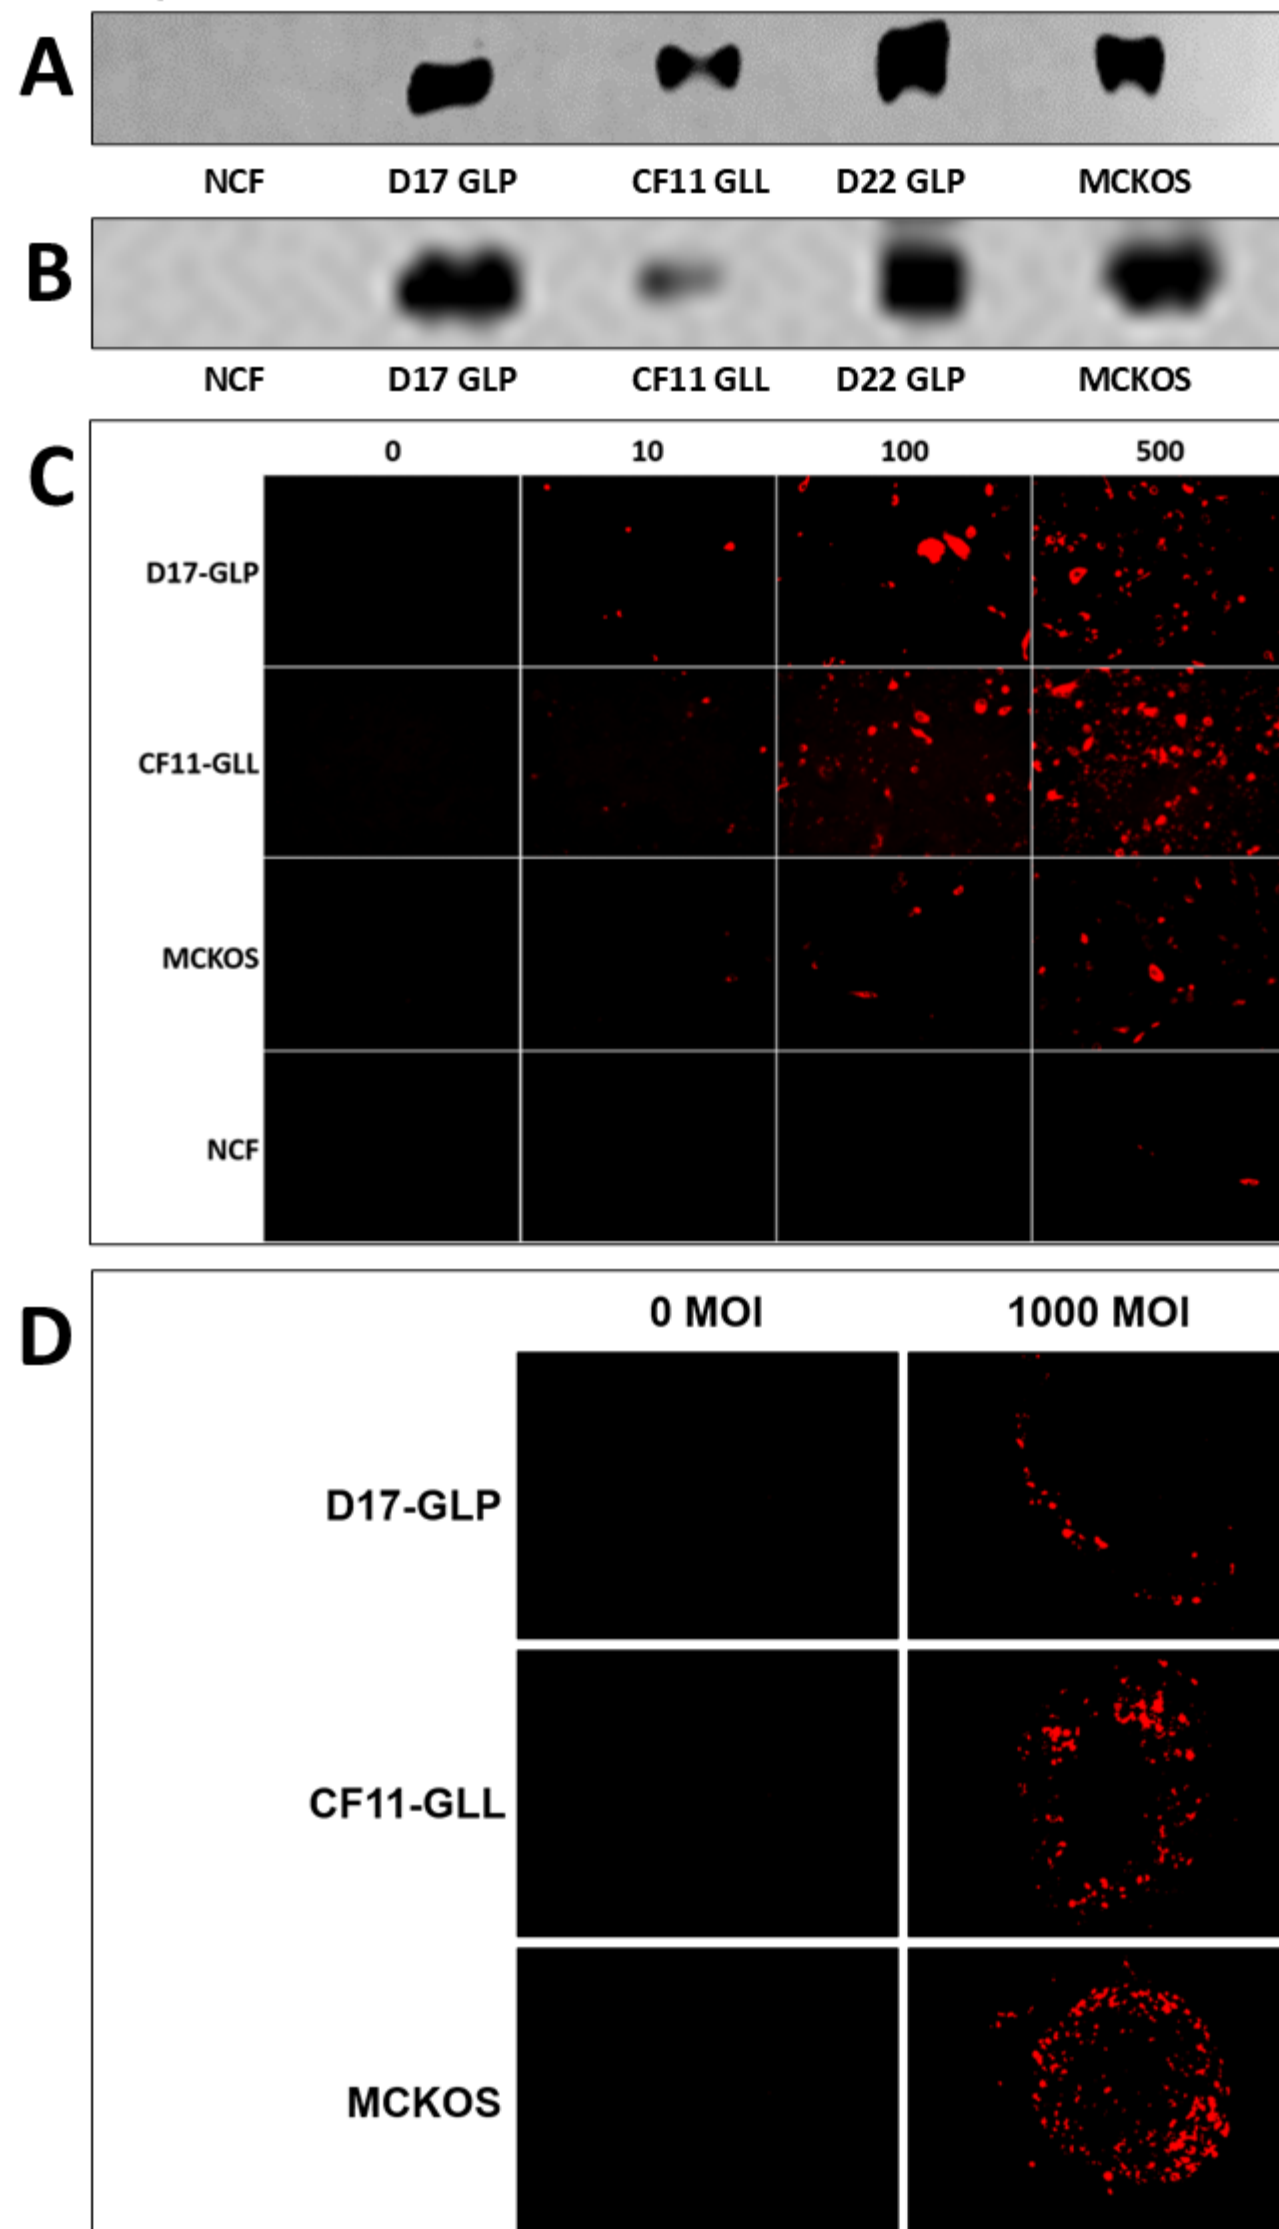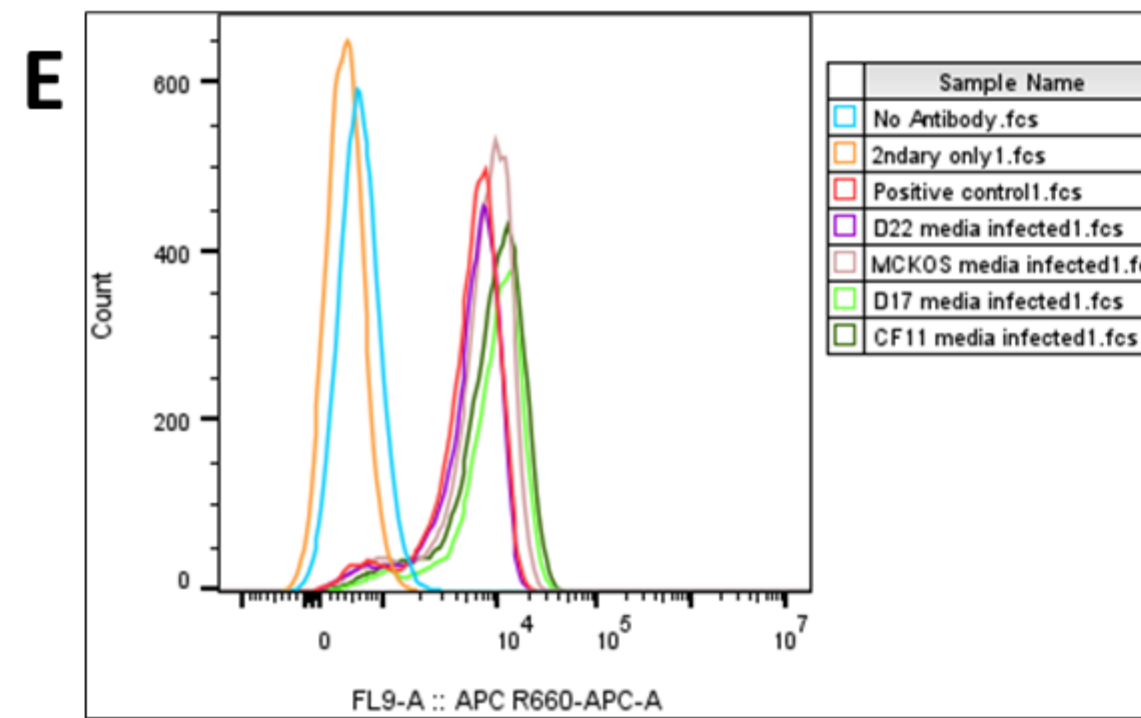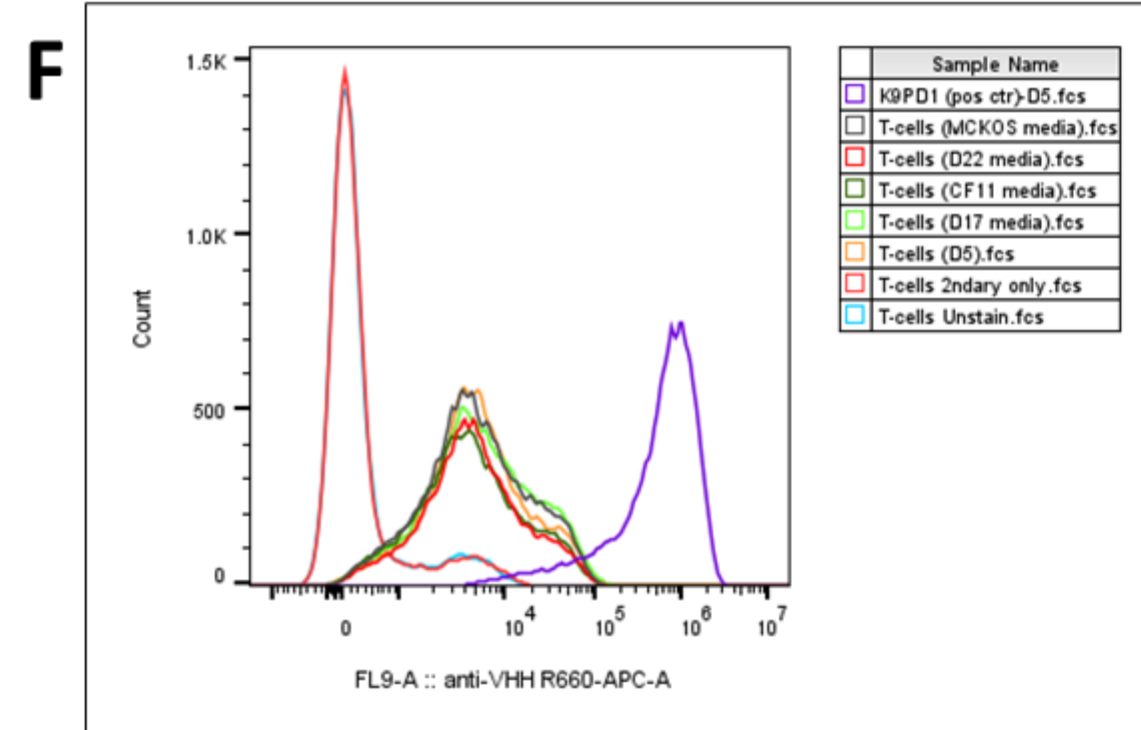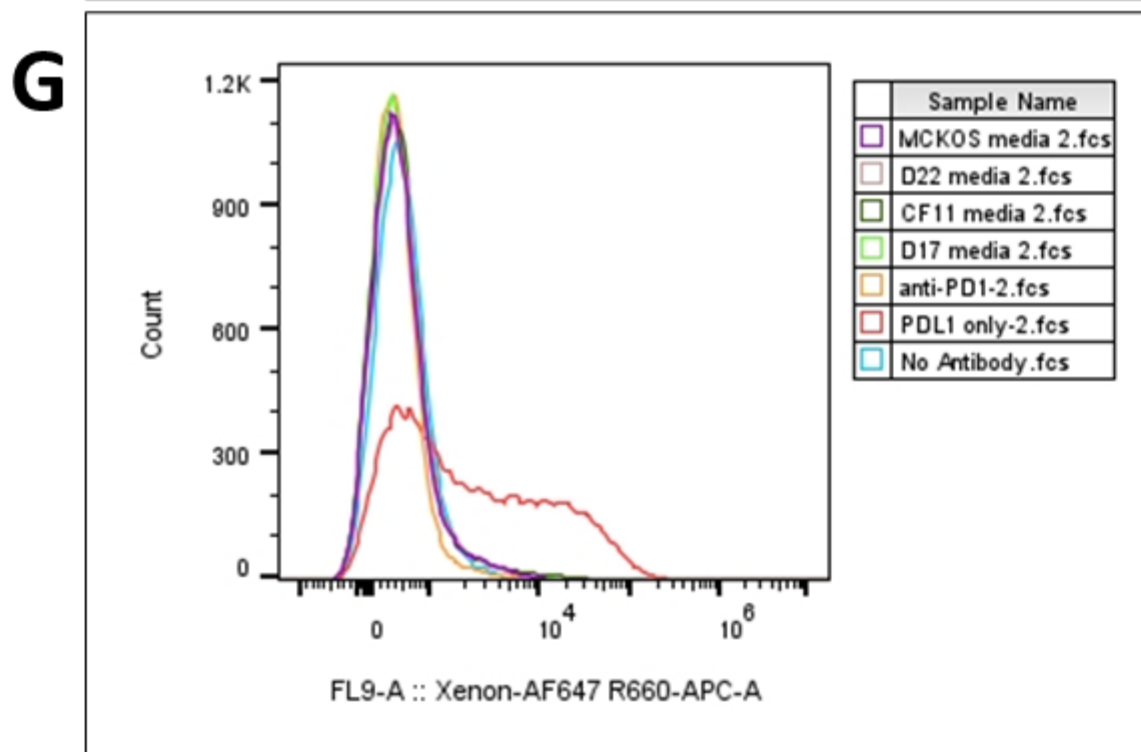

**H**

| Cell Line | Source of Anti-PD1 Ab                      | % of Cells Labeled by Anti-PD1 Ab |
|-----------|--------------------------------------------|-----------------------------------|
|           | Purified anti-PD1 D5 Ab (Positive Control) | 91.00                             |
| D17 GLP   | Purified Media                             | 92.61                             |
| CF11 GLL  | Purified Media                             | 92.72                             |
| MCKOS     | Purified Media                             | 92.01                             |
| D22 GLP   | Purified Media                             | 89.97                             |

**I**

| Cell Line | Source of Anti-PD1 Ab                      | % of T Cells Labeled by Anti-PD1 Ab |
|-----------|--------------------------------------------|-------------------------------------|
|           | Purified anti-PD1 D5 Ab (Positive Control) | 45.57                               |
| D17 GLP   | Purified Media                             | 36.04                               |
| CF11 GLL  | Purified Media                             | 37.14                               |
| MCKOS     | Purified Media                             | 41.43                               |
| D22 GLP   | Purified Media                             | 38.65                               |

**J**

| Cell Line | Source of Anti-PD1 Ab                      | % of Cells Labeled by Anti-AF647-Labeled PD-L1 Recombinant Protein |
|-----------|--------------------------------------------|--------------------------------------------------------------------|
|           | No Anti-PD 1Ab                             | 55.07                                                              |
|           | Purified anti-PD1 D5 Ab (Positive Control) | 1.25                                                               |
| D17 GLP   | Purified Media                             | 2.31                                                               |
| CF11 GLL  | Purified Media                             | 2.19                                                               |
| MCKOS     | Purified Media                             | 2.38                                                               |
| D22 GLP   | Purified Media                             | 2.39                                                               |
