# Supplementary material for: Immune modulatory oncolytic virus for osteosarcoma therapy
Source: Research Square preprint supplement (doi:10.21203/rs.3.rs-9488970/v1), 2026-05-04
Supplement: Supplementary file 2 [file f560445e60d5a4c955c6e480.pdf]

**Figure S1.**

**D17 GLP T1**

Day 0

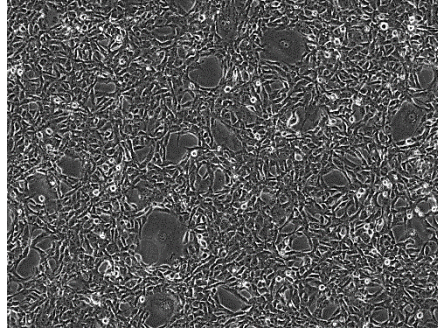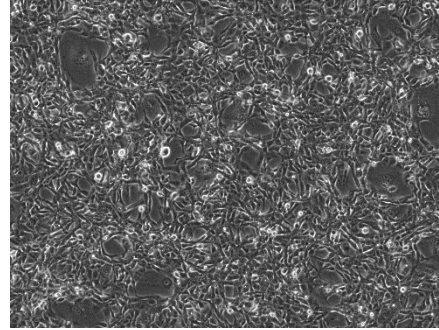

Day 3

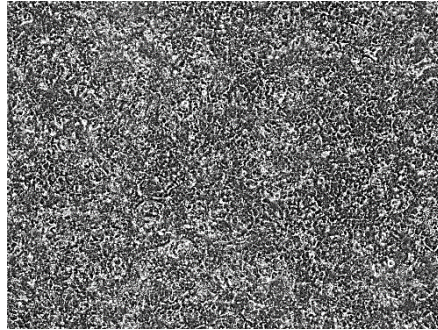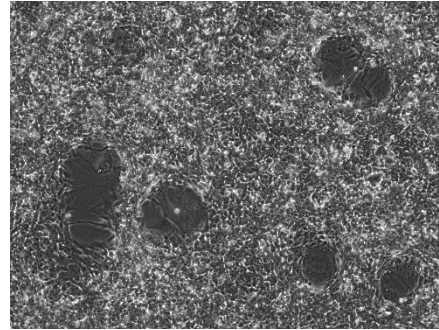

Day 5

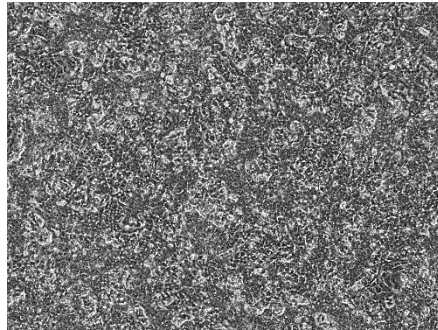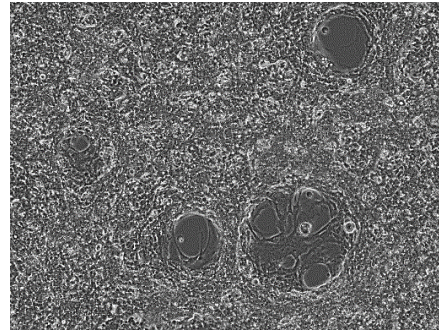

0 MOI

100 MOI

D17 GLP cells were infected with CAV-AU-M3 at MOI 0 and 100, and 1000, and images were visualized on day 0, 3, and 5 post-infection by inverted microscopy (Keyence) at 10X magnification. This represents three independent experiments.

**Figure S2.**

**D17 GLP T2**

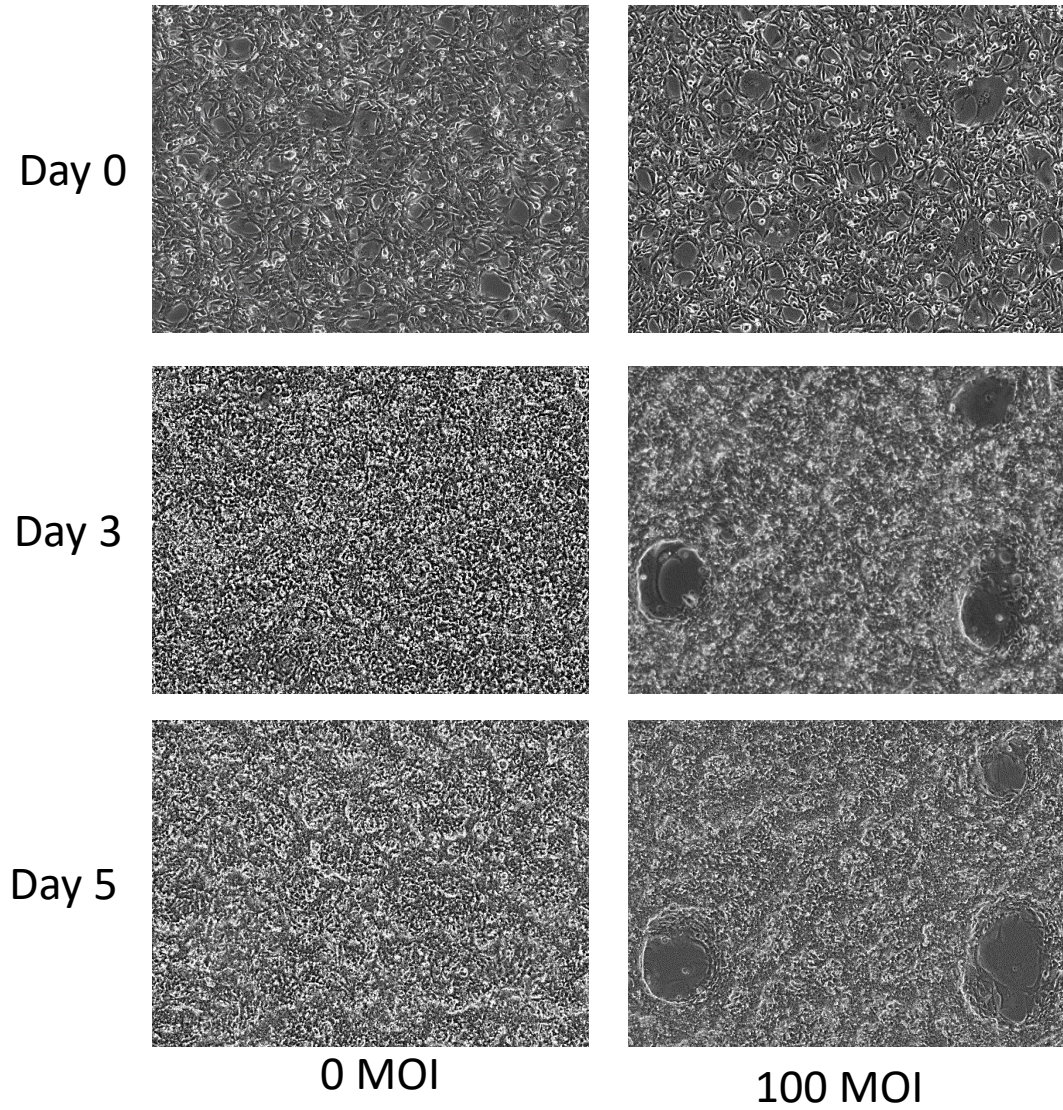

D17 GLP cells were infected with CAV-AU-M3 at MOI 0 and 100, and 1000, and images were visualized on day 0, 3, and 5 post-infection by inverted microscopy (Keyence) at 10X magnification. This represents three independent experiments.

**Figure S3.**

**D17 GLP T3**

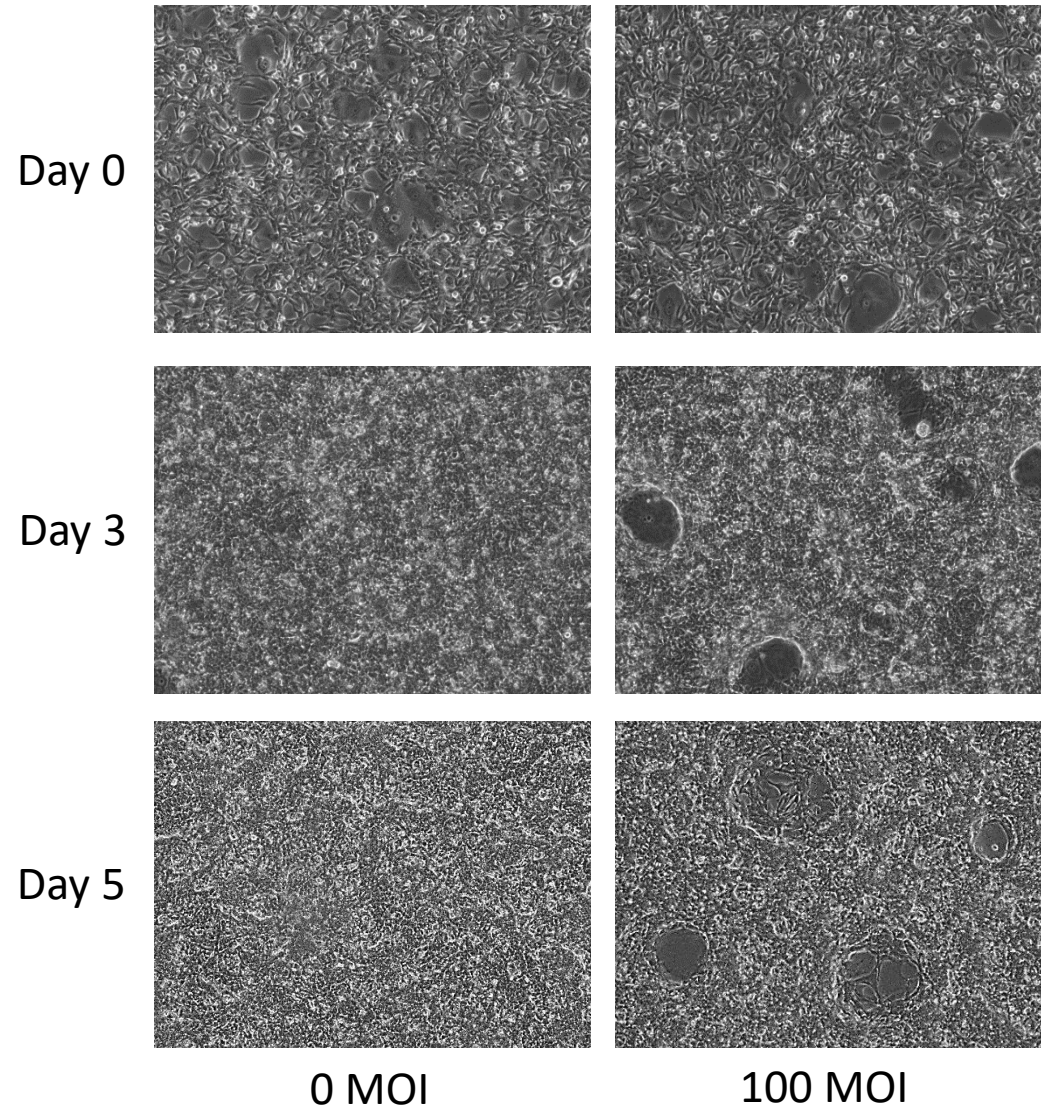

**D17 GLP cells were infected with CAV-AU-M3 at MOI 0 and 100, and 1000, and images were visualized on day 0, 3, and 5 post-infection by inverted microscopy (Keyence) at 10X magnification. This represents three independent experiments.**

**Figure S4.**

CF11 GLL T1

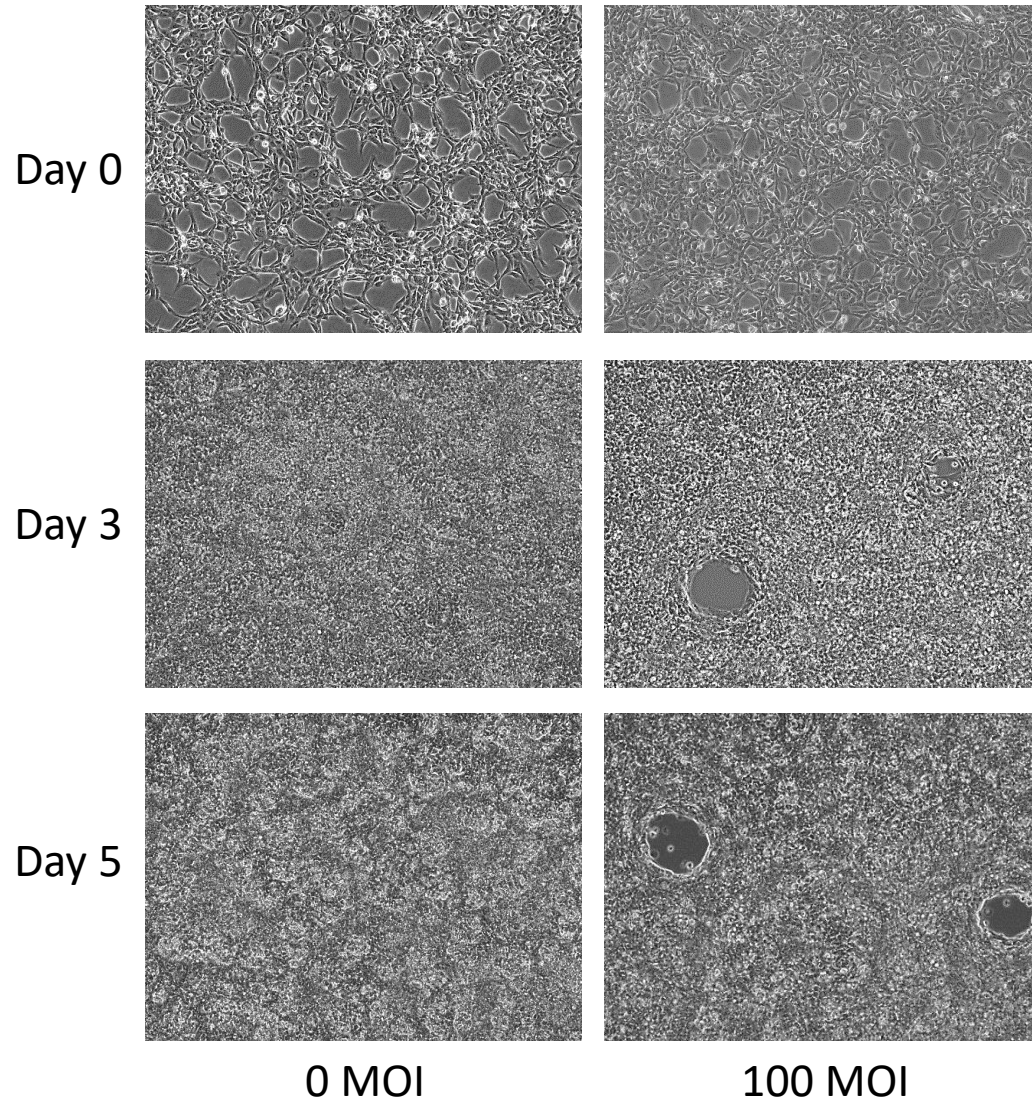

CF11 GLL cells were infected with CAV-AU-M3 at MOI 0 and 100, and 1000, and images were visualized on day 0, 3, and 5 post-infection by inverted microscopy (Keyence) at 10X magnification. This represents three independent experiments.

**Figure S5.**

CF11 GLL T2

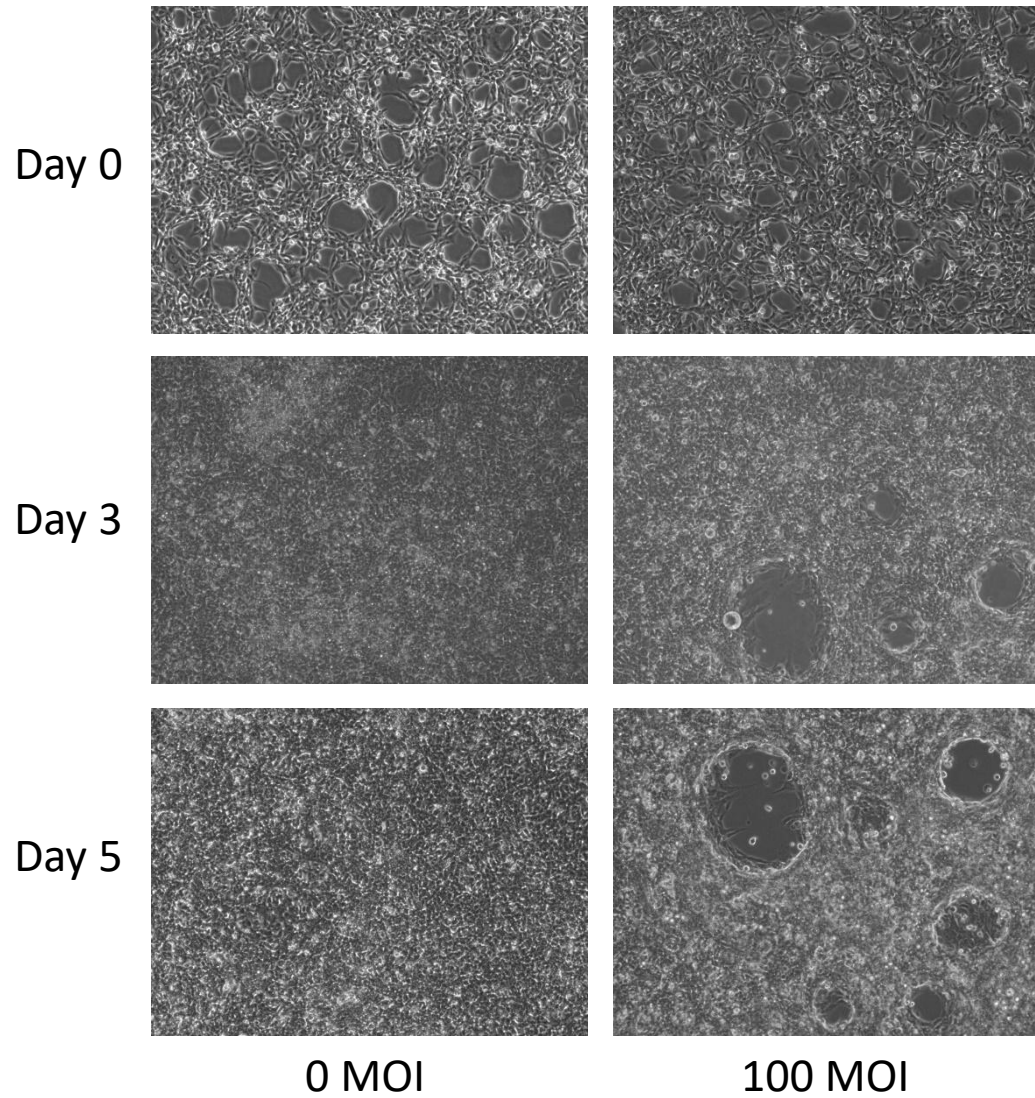

CF11 GLL cells were infected with CAV-AU-M3 at MOI 0 and 100, and 1000, and images were visualized on day 0, 3, and 5 post-infection by inverted microscopy (Keyence) at 10X magnification. This represents three independent experiments.

**Figure S6.**

**CF11 GLL T3**

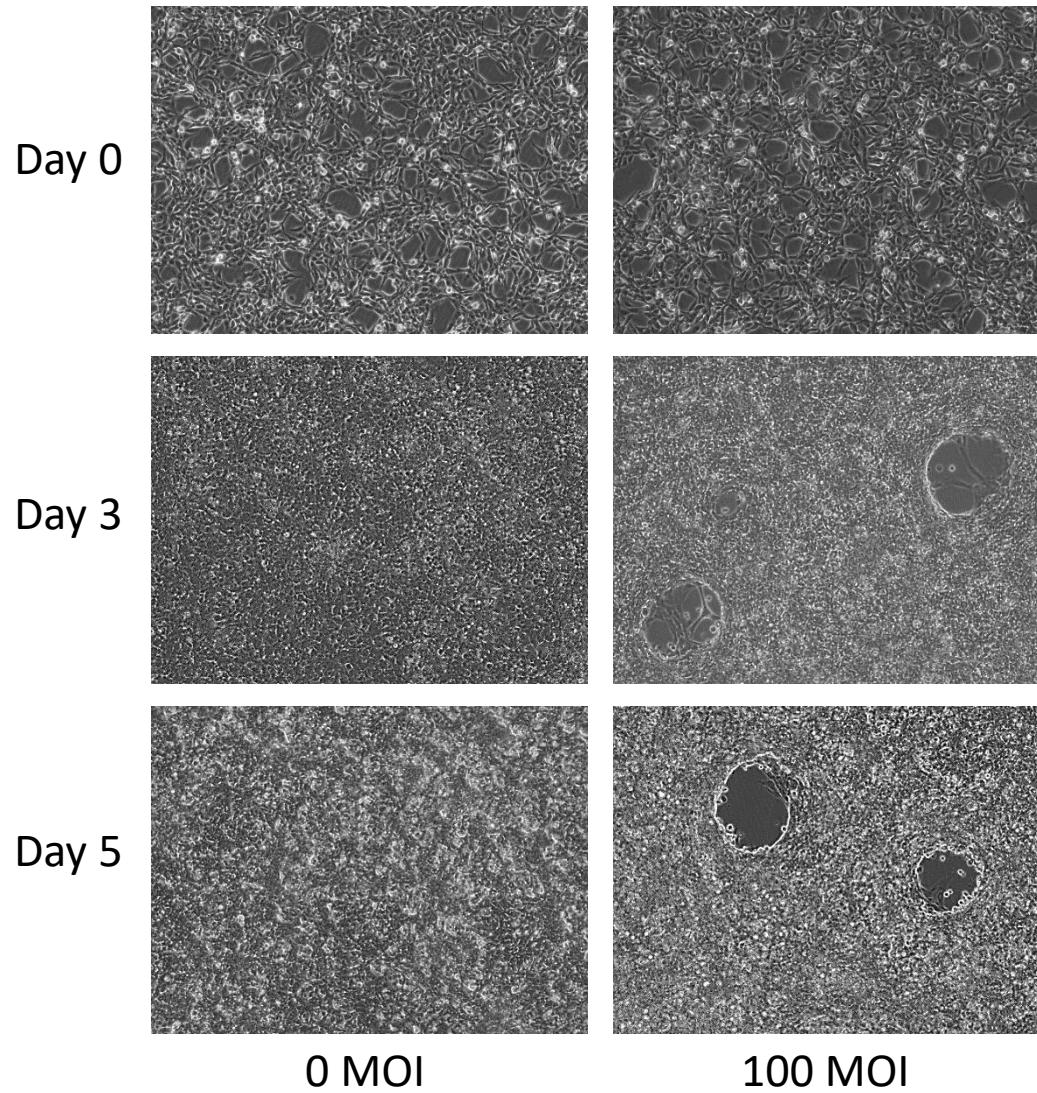

CF11 GLL cells were infected with CAV-AU-M3 at MOI 0 and 100, and 1000, and images were visualized on day 0, 3, and 5 post-infection by inverted microscopy (Keyence) at 10X magnification. This represents three independent experiments.

**Figure S7.**

**D22 GLP T1**

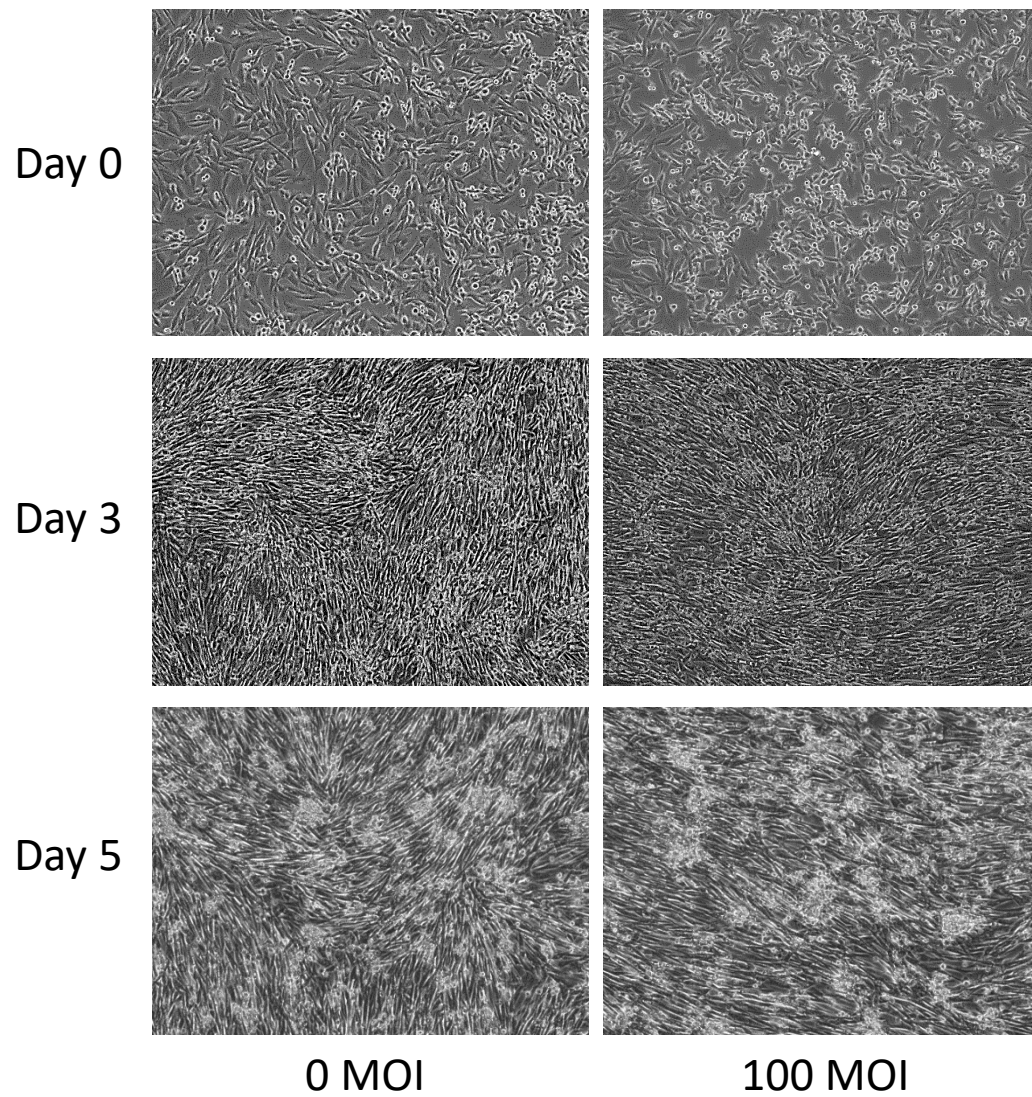

D22 GLP cells were infected with CAV-AU-M3 at MOI 0 and 100, and 1000, and images were visualized on day 0, 3, and 5 post-infection by inverted microscopy (Keyence) at 10X magnification. This represents three independent experiments.

**Figure S8.**

**D22 GLP T2**

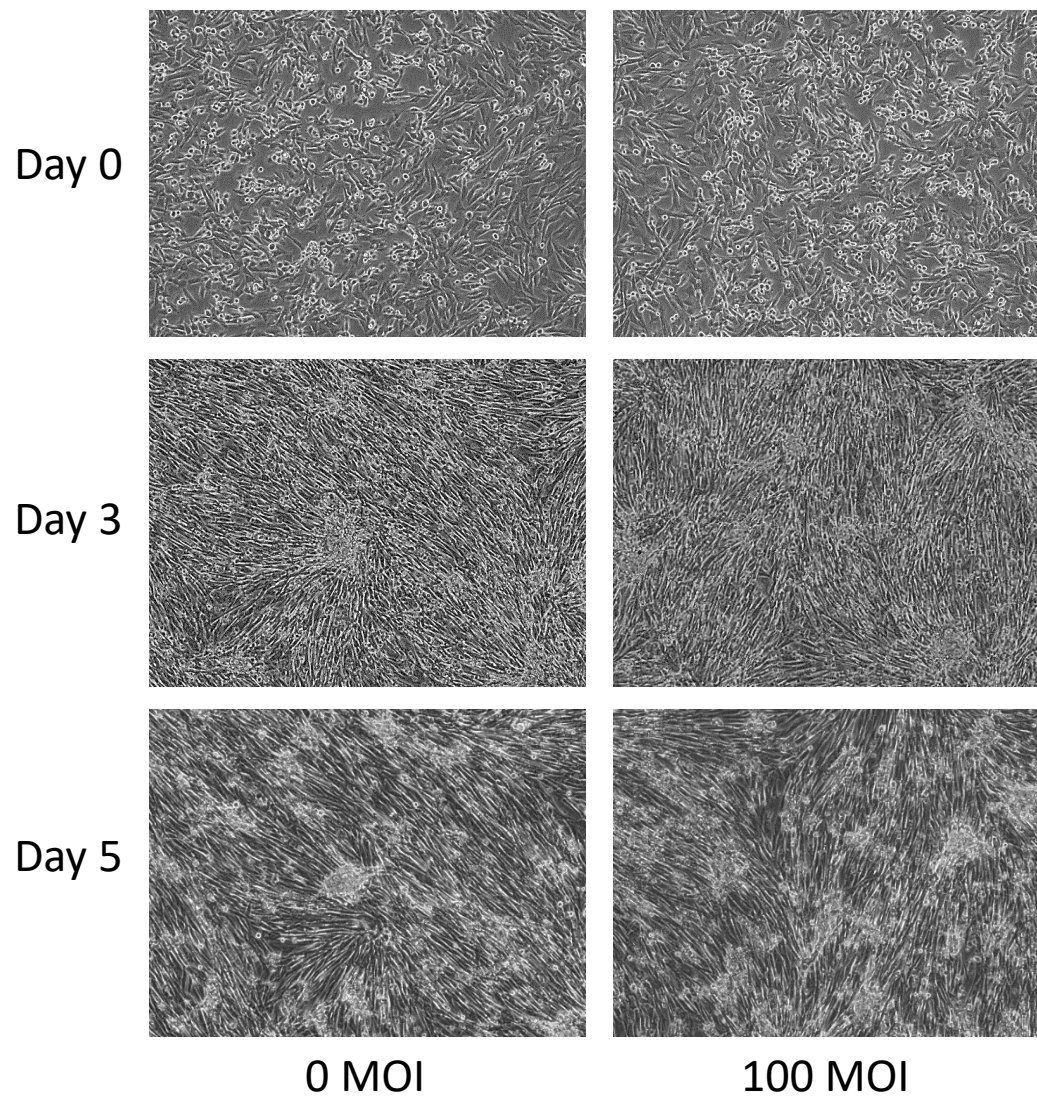

D22 GLP cells were infected with CAV-AU-M3 at MOI 0 and 100, and 1000, and images were visualized on day 0, 3, and 5 post-infection by inverted microscopy (Keyence) at 10X magnification. This represents three independent experiments.

**Figure S9.**

**D22 GLP T3**

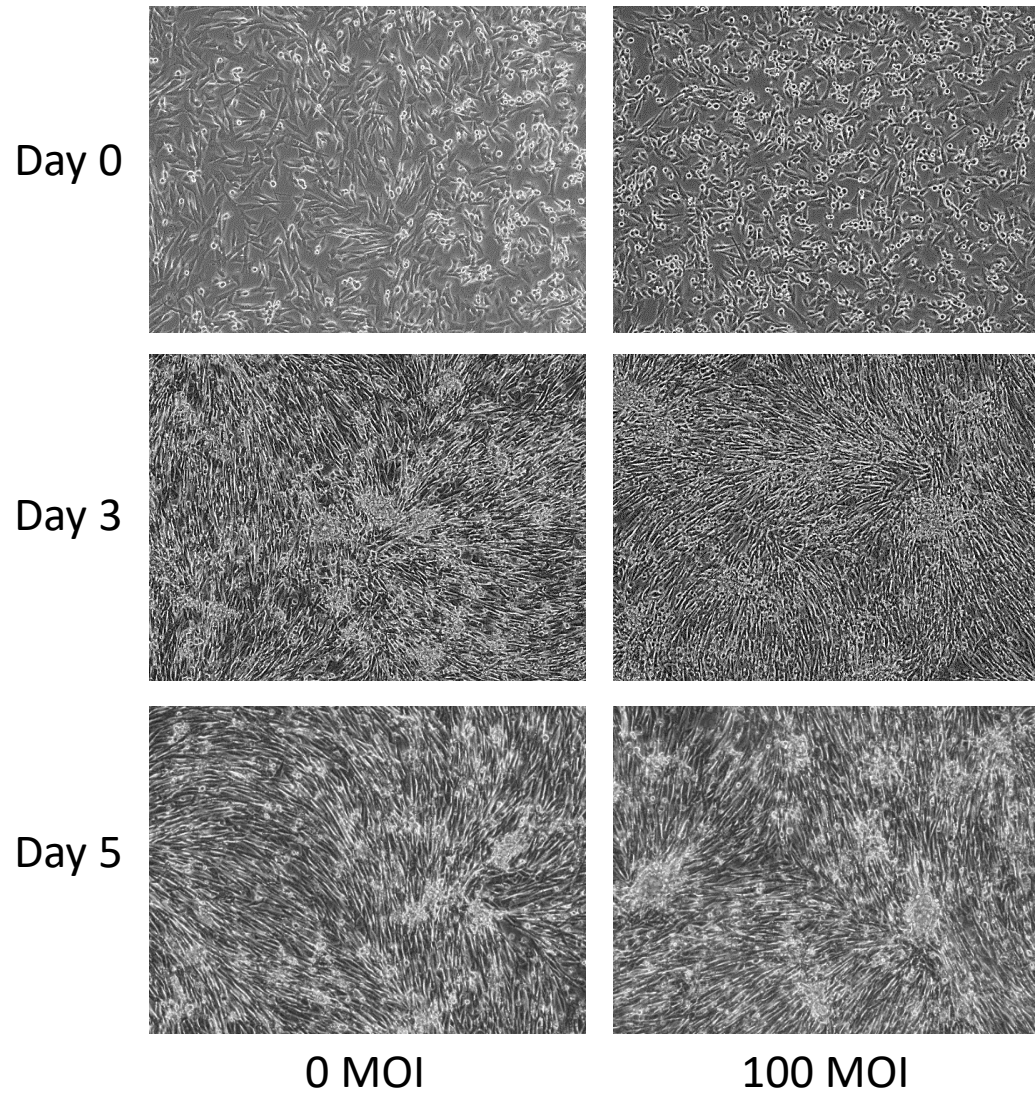

D22 GLP cells were infected with CAV-AU-M3 at MOI 0 and 100, and 1000, and images were visualized on day 0, 3, and 5 post-infection by inverted microscopy (Keyence) at 10X magnification. This represents three independent experiments.

**Figure S10.**

**MCKOS T1**

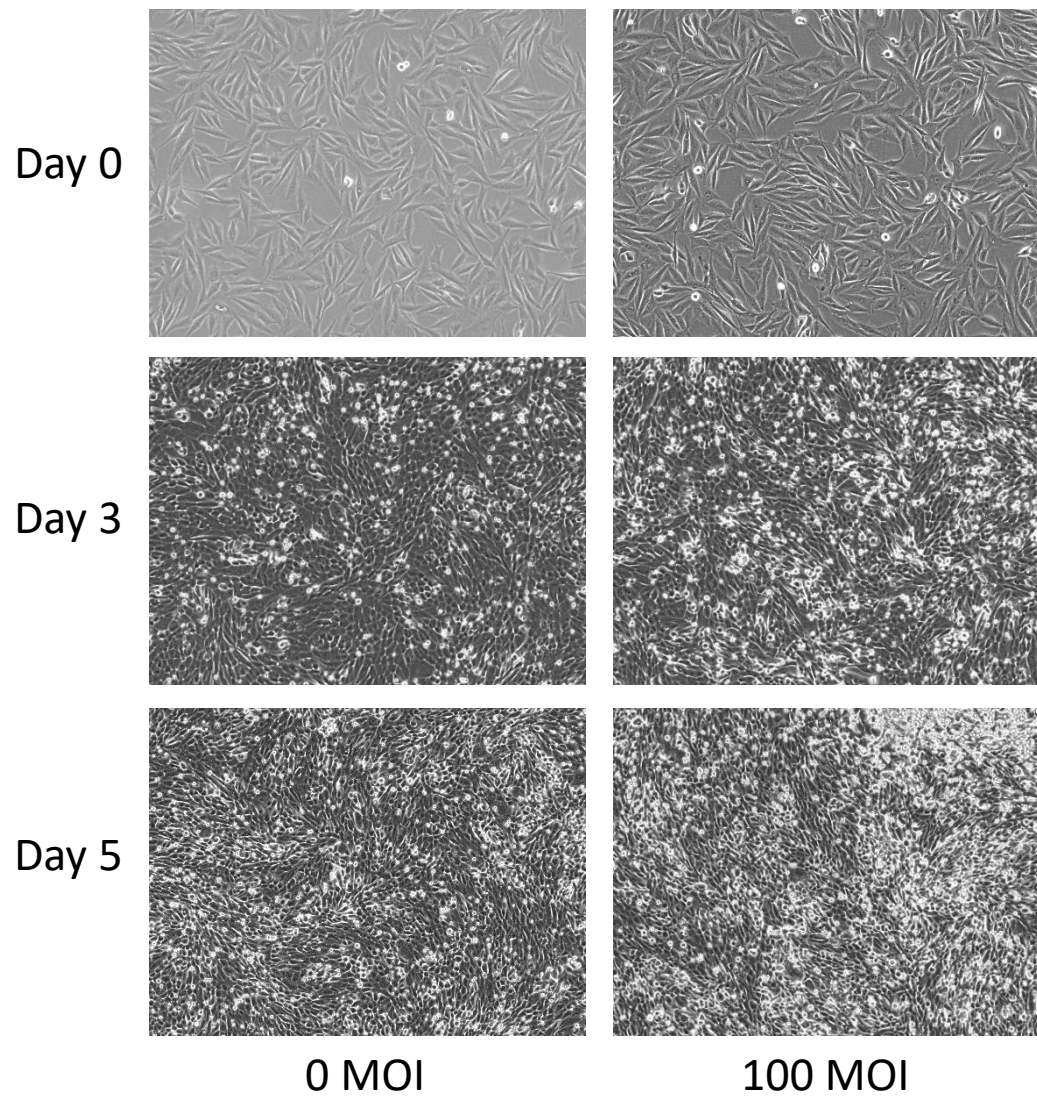

MCKOS cells were infected with CAV-AU-M3 at MOI 0 and 100, and 1000, and images were visualized on day 0, 3, and 5 post-infection by inverted microscopy (Keyence) at 10X magnification. This represents three independent experiments.

**Figure S11.**

**MCKOS T2**

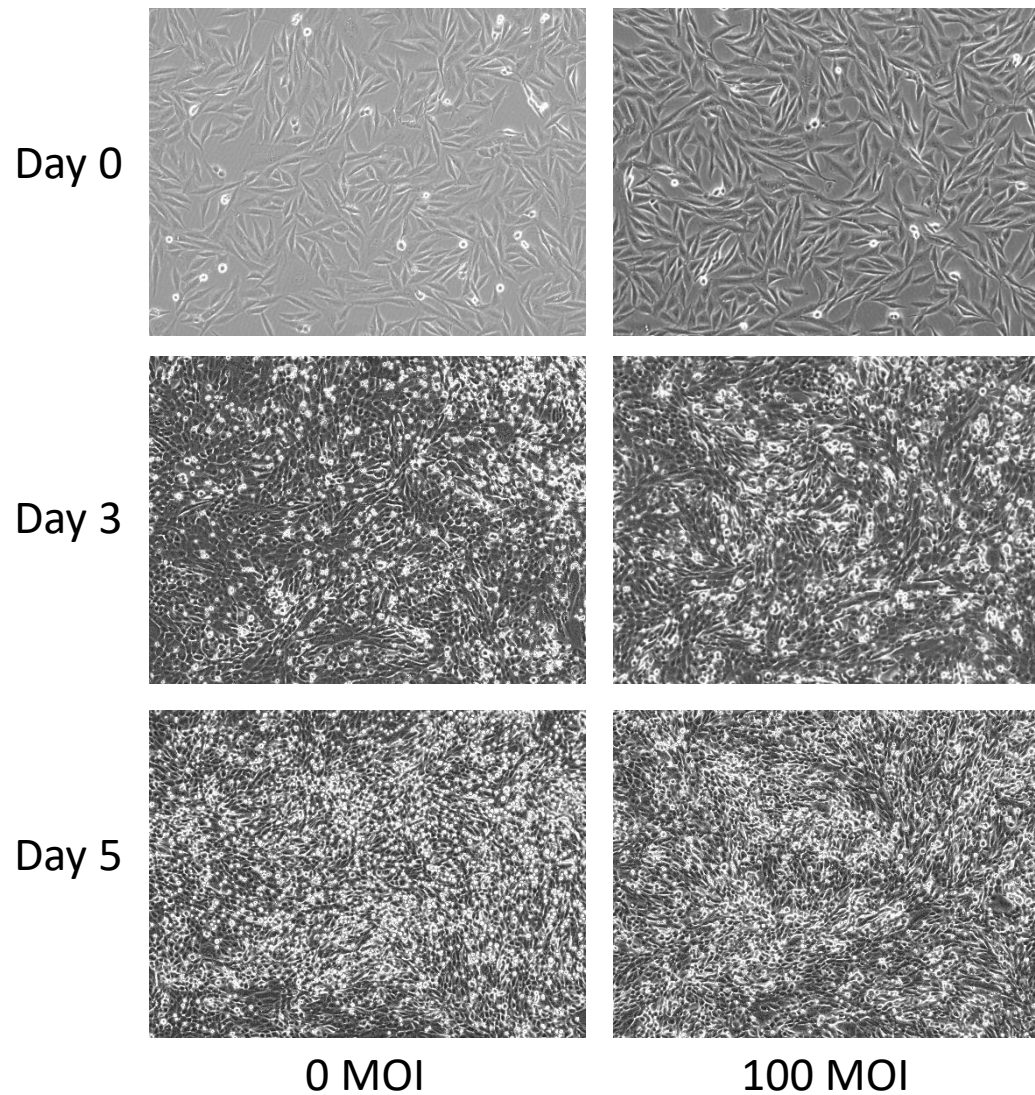

MCKOS cells were infected with CAV-AU-M3 at MOI 0 and 100, and 1000, and images were visualized on day 0, 3, and 5 post-infection by inverted microscopy (Keyence) at 10X magnification. This represents three independent experiments.

**Figure S12.**

**MCKOS T3**

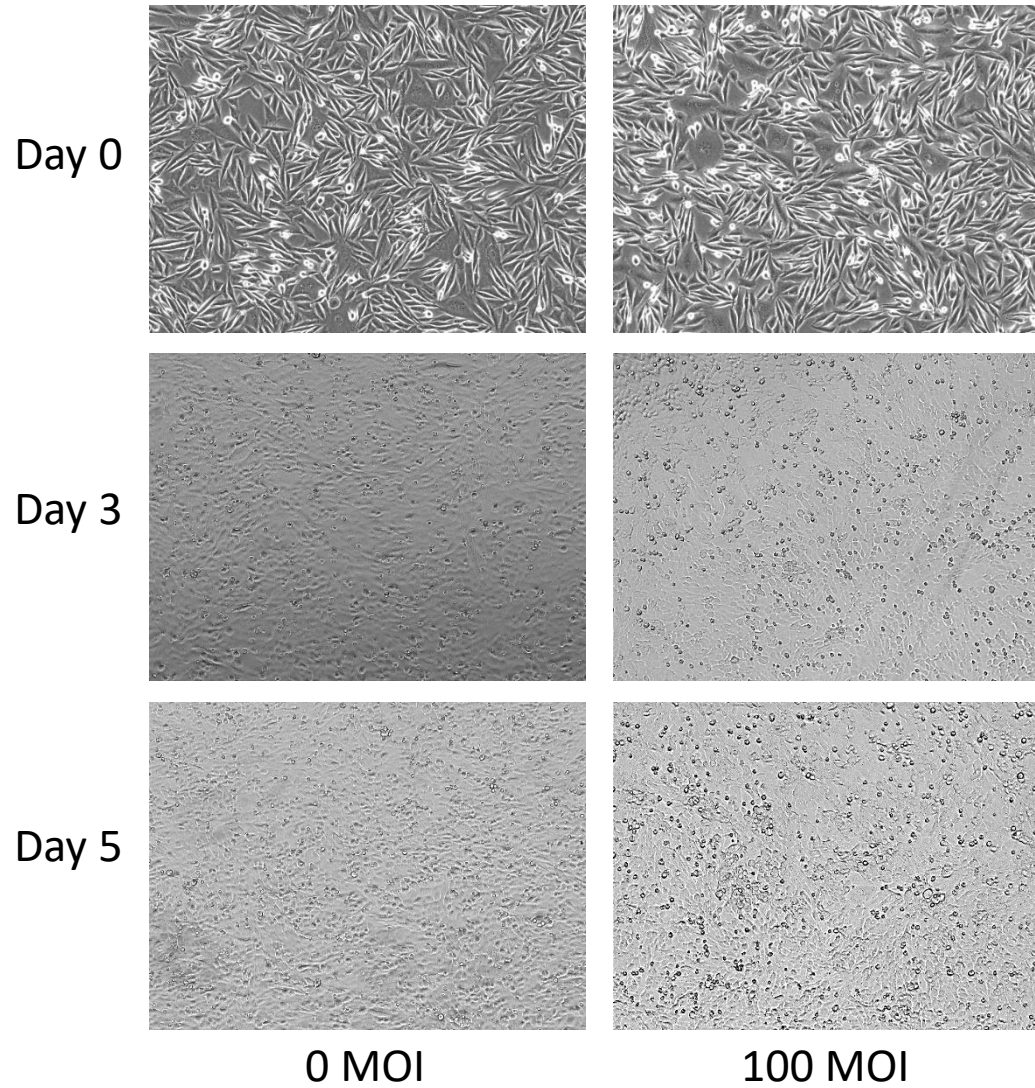

MCKOS cells were infected with CAV-AU-M3 at MOI 0 and 100, and 1000, and images were visualized on day 0, 3, and 5 post-infection by inverted microscopy (Keyence) at 10X magnification. This represents three independent experiments.

**Figure S13.**

**D17 GLP T1**

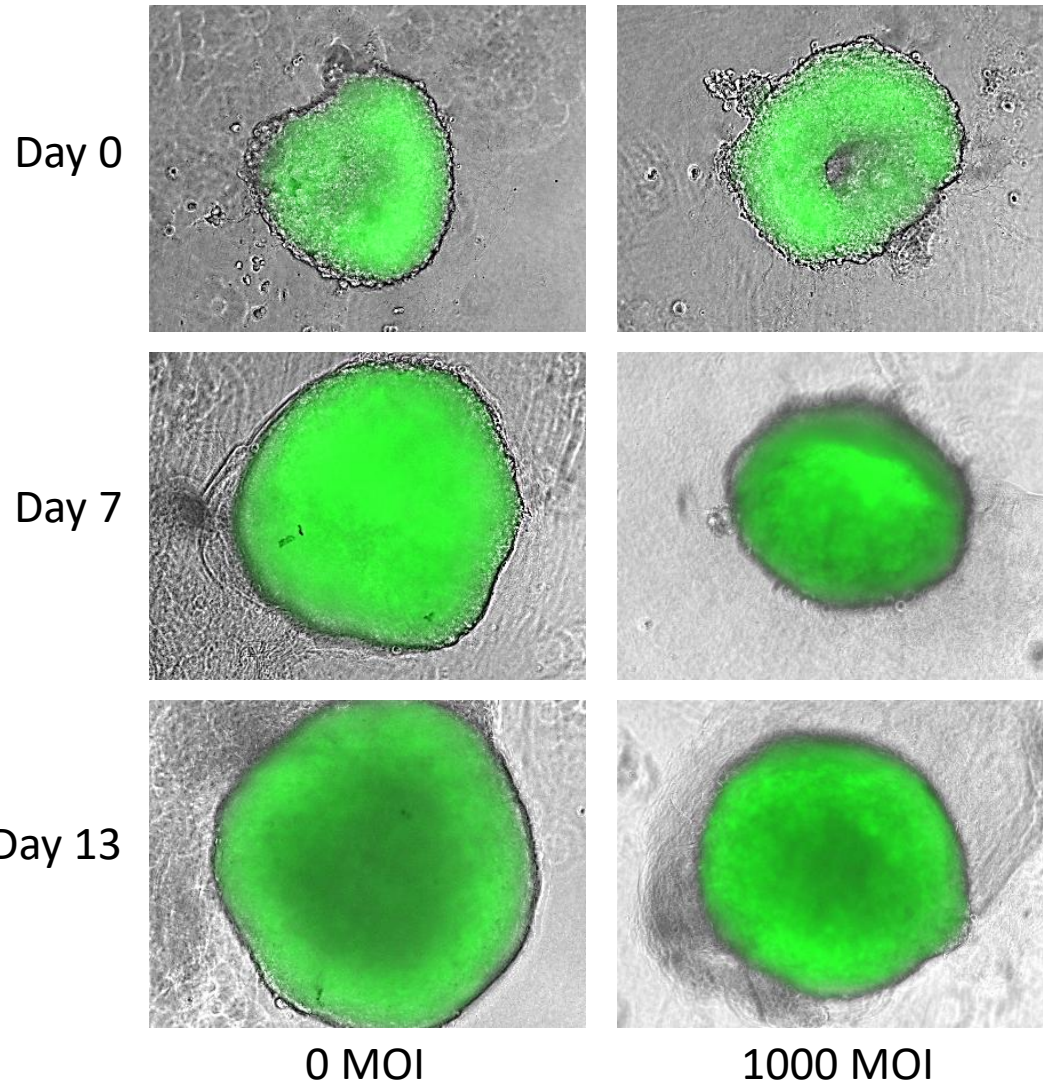

D17 GLP cell lines spheroids were infected with CAV-AU-M3 at MOI 0 and 1000, and the spheroid shrinkage and cytopathic effects were visualized at Day 0, 7, and 13 post-infection by fluorescence microscopy (Keyence) at 10X magnification. This is a representation of three independent experiments.

**Figure S14.**

**D17 GLP T2**

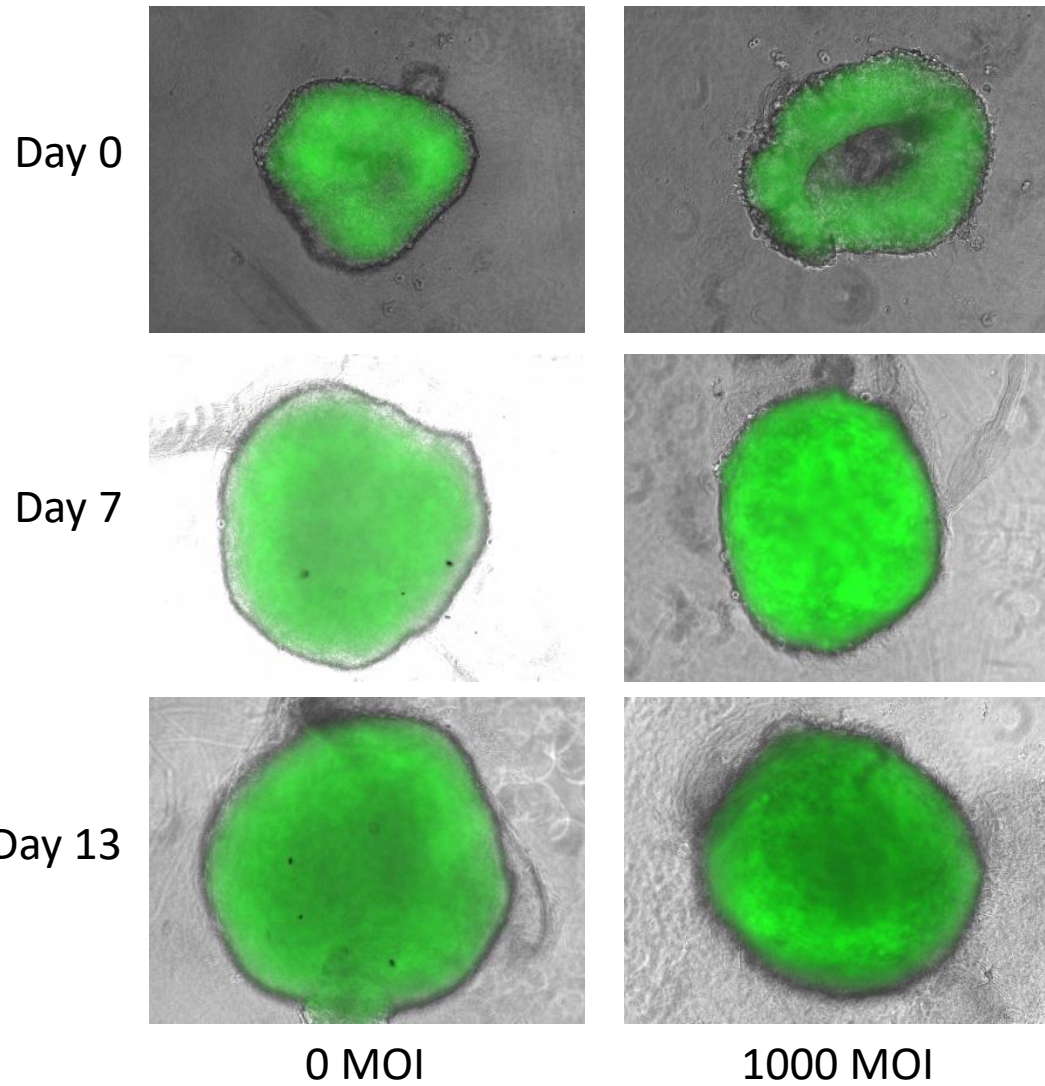

D17 GLP cell lines spheroids were infected with CAV-AU-M3 at MOI 0 and 1000, and the spheroid shrinkage and cytopathic effects were visualized at Day 0, 7, and 13 post-infection by fluorescence microscopy (Keyence) at 10X magnification. This is a representation of three independent experiments.

**Figure S15.**

**D17 GLP T3**

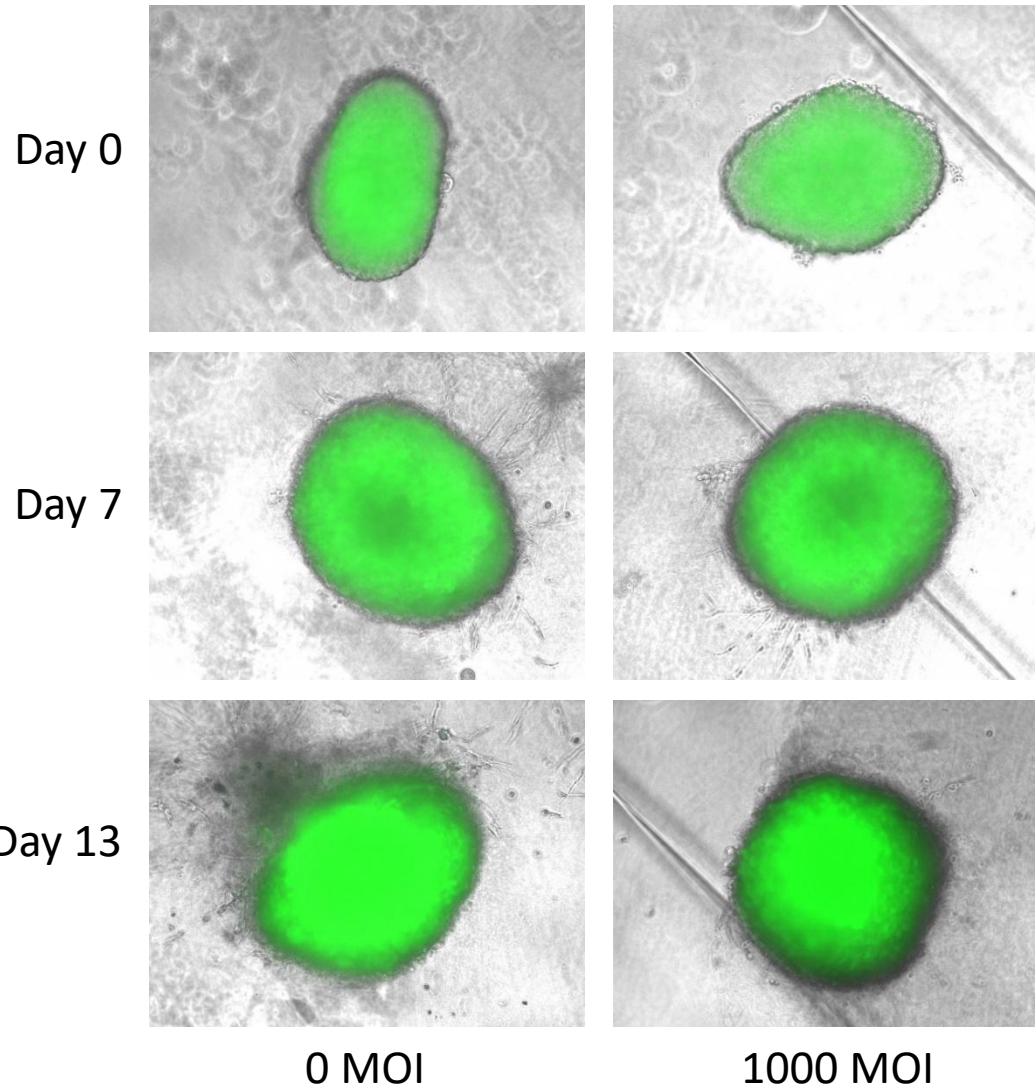

D17 GLP cell lines spheroids were infected with CAV-AU-M3 at MOI 0 and 1000, and the spheroid shrinkage and cytopathic effects were visualized at Day 0, 7, and 13 post-infection by fluorescence microscopy (Keyence) at 10X magnification. This is a representation of three independent experiments.

**Figure S16.**

**CF11 GLL T1**

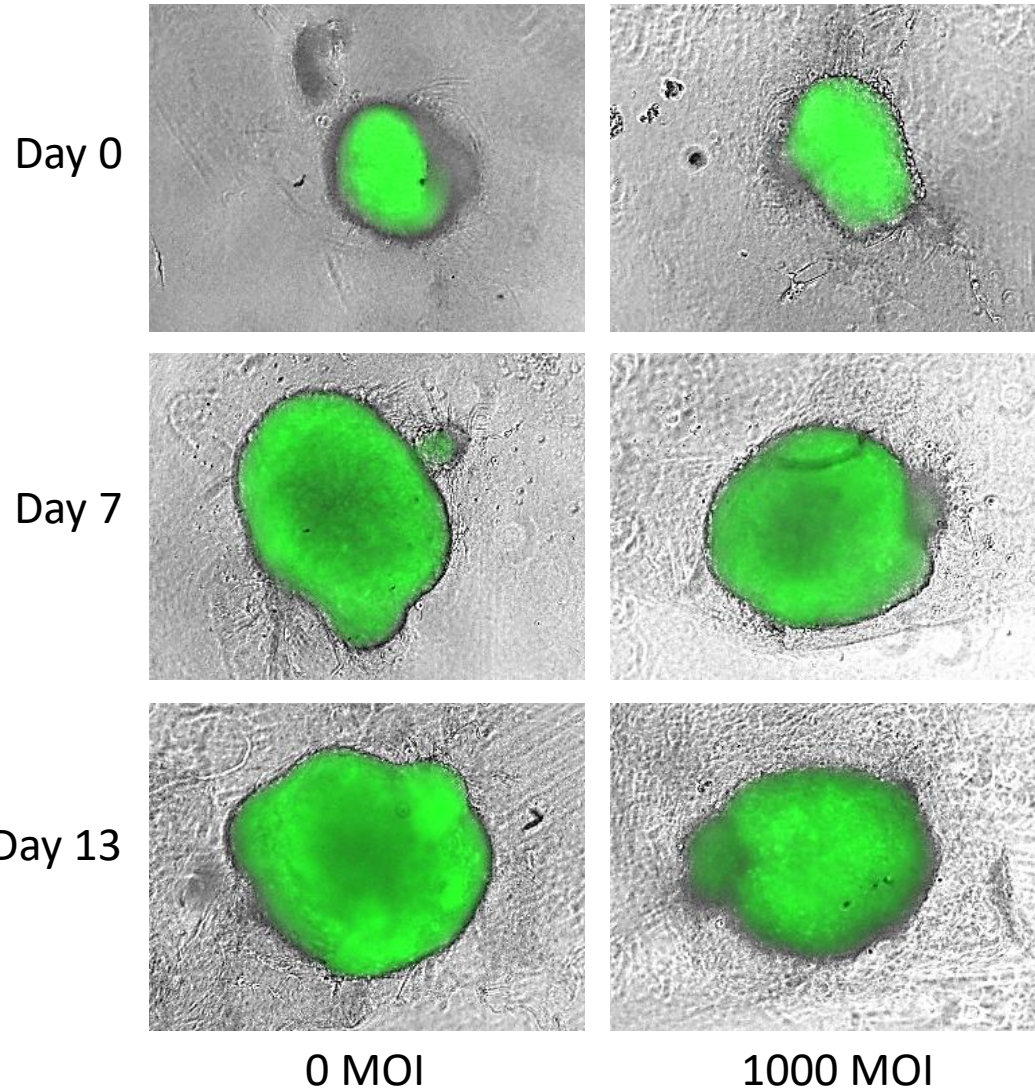

CF11 GLL cell lines spheroids were infected with CAV-AU-M3 at MOI 0 and 1000, and the spheroid shrinkage and cytopathic effects were visualized at Day 0, 7, and 13 post-infection by fluorescence microscopy (Keyence) at 10X magnification. This is a representation of three independent experiments.

**Figure S17.**

**CF11 GLL T2**

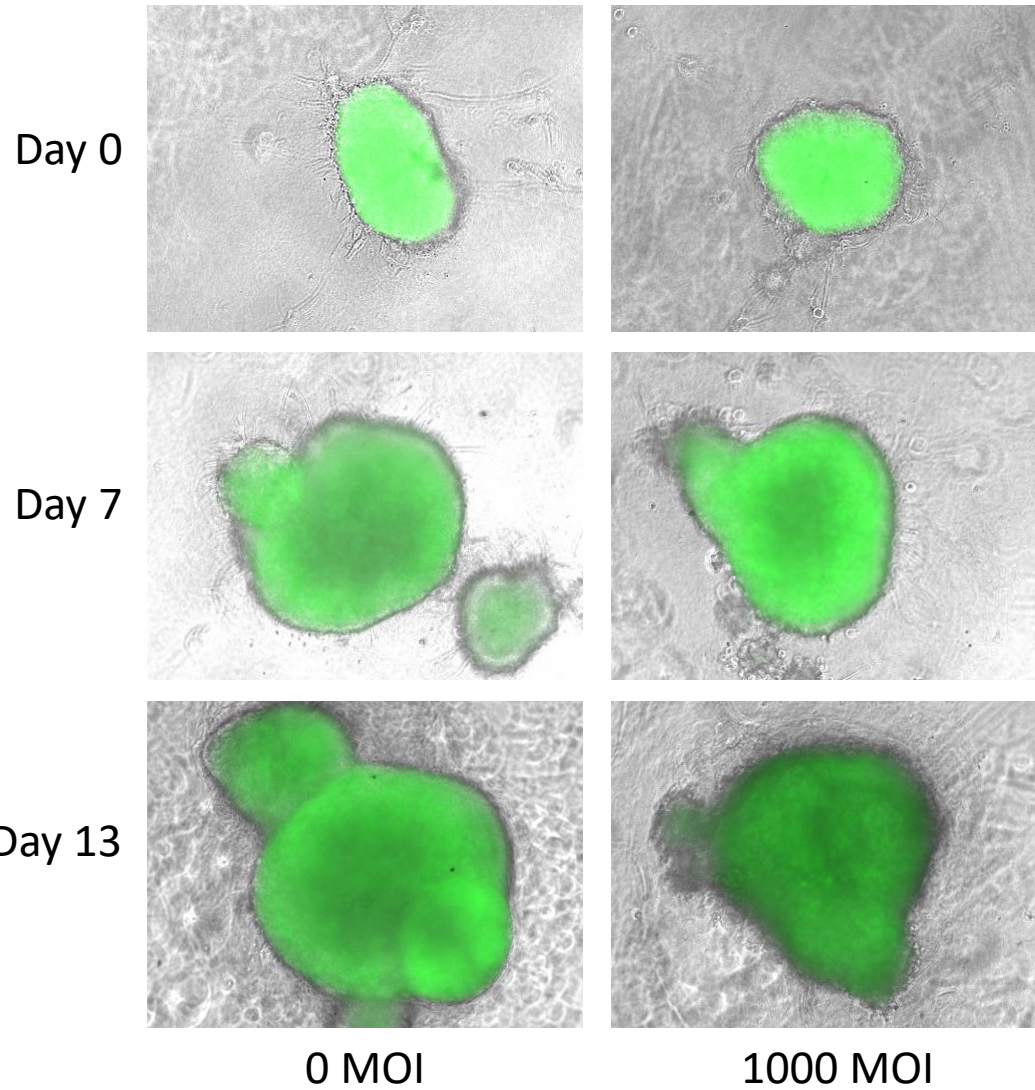

CF11 GLL cell lines spheroids were infected with CAV-AU-M3 at MOI 0 and 1000, and the spheroid shrinkage and cytopathic effects were visualized at Day 0, 7, and 13 post-infection by fluorescence microscopy (Keyence) at 10X magnification. This is a representation of three independent experiments.

**Figure S18.**

**CF11 GLL T3**

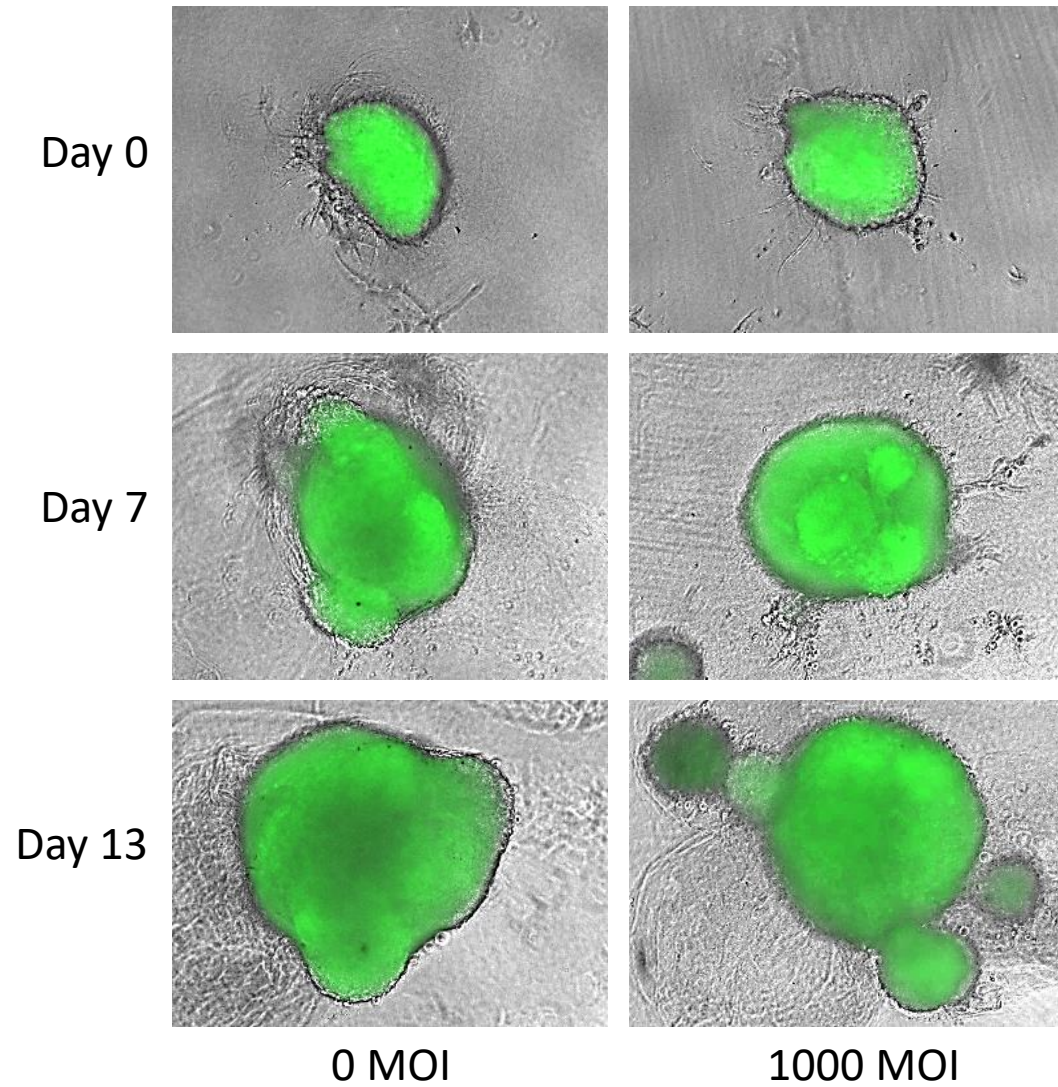

CF11 GLL cell lines spheroids were infected with CAV-AU-M3 at MOI 0 and 1000, and the spheroid shrinkage and cytopathic effects were visualized at Day 0, 7, and 13 post-infection by fluorescence microscopy (Keyence) at 10X magnification. This is a representation of three independent experiments.

**Figure S19.**

**D22 GLP T1**

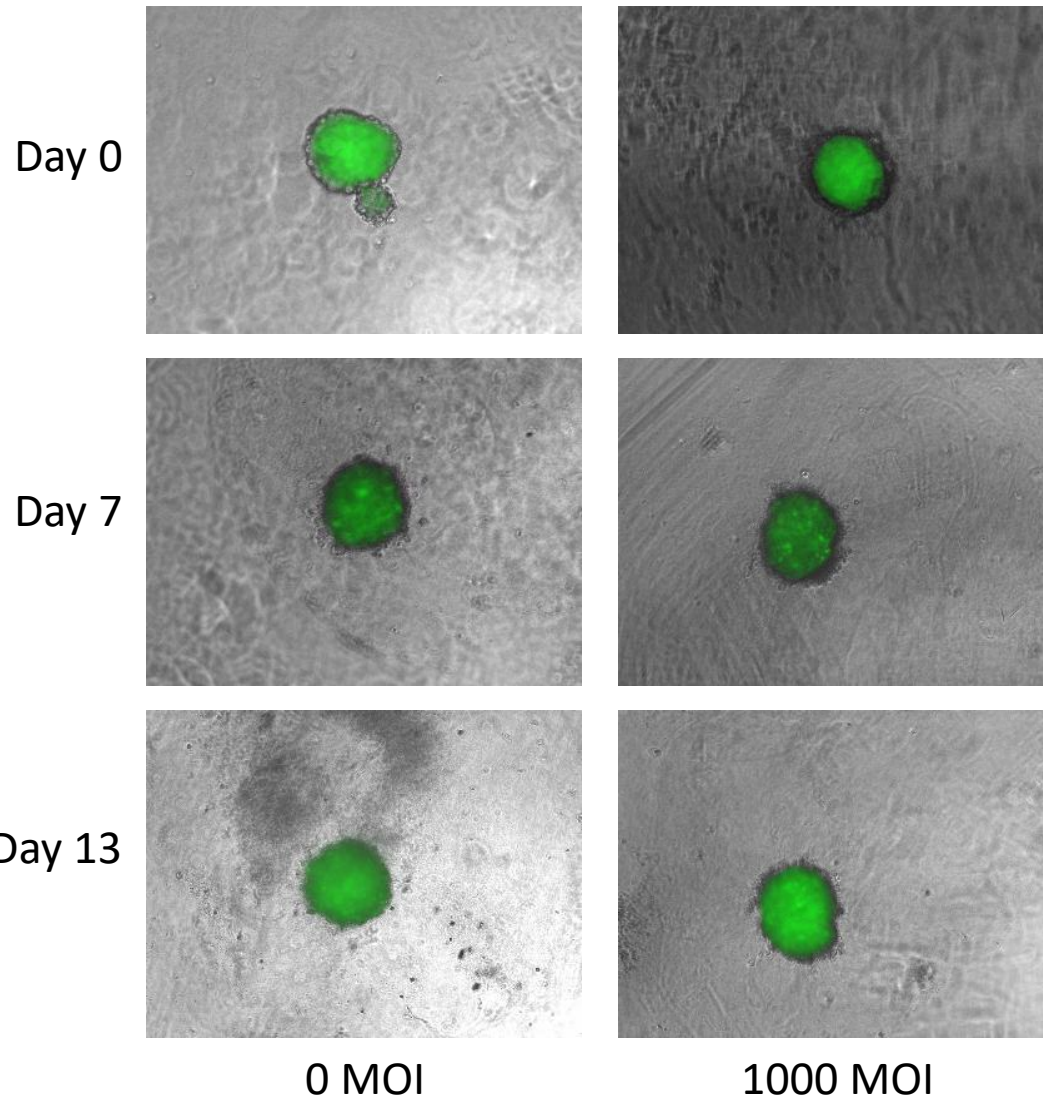

D22 GLP cell lines spheroids were infected with CAV-AU-M3 at MOI 0 and 1000, and the spheroid shrinkage and cytopathic effects were visualized at Day 0, 7, and 13 post-infection by fluorescence microscopy (Keyence) at 10X magnification. This is a representation of three independent experiments.

**Figure S20.**

**D22 GLP T2**

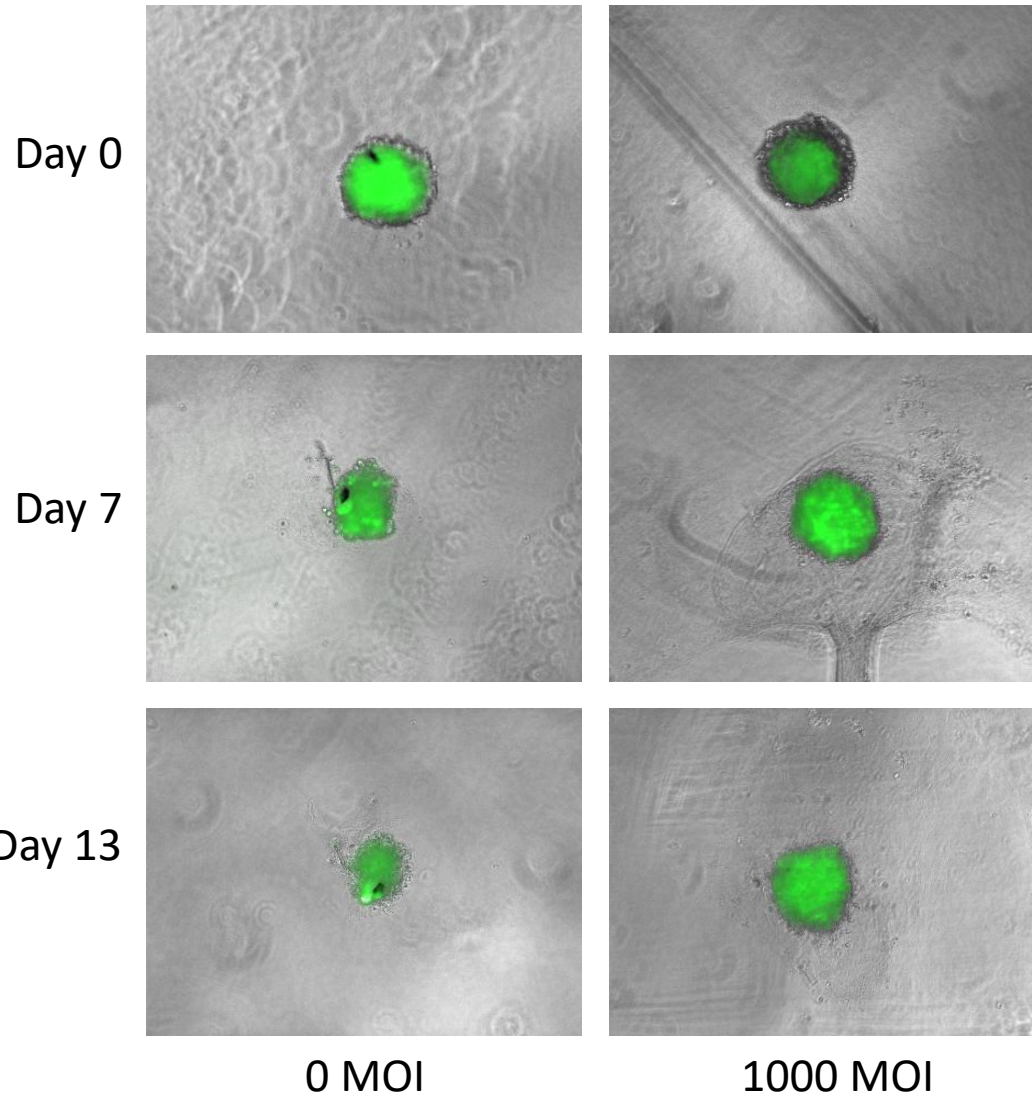

D22 GLP cell lines spheroids were infected with CAV-AU-M3 at MOI 0 and 1000, and the spheroid shrinkage and cytopathic effects were visualized at Day 0, 7, and 13 post-infection by fluorescence microscopy (Keyence) at 10X magnification. This is a representation of three independent experiments.

**Figure S21.**

**D22 GLP T3**

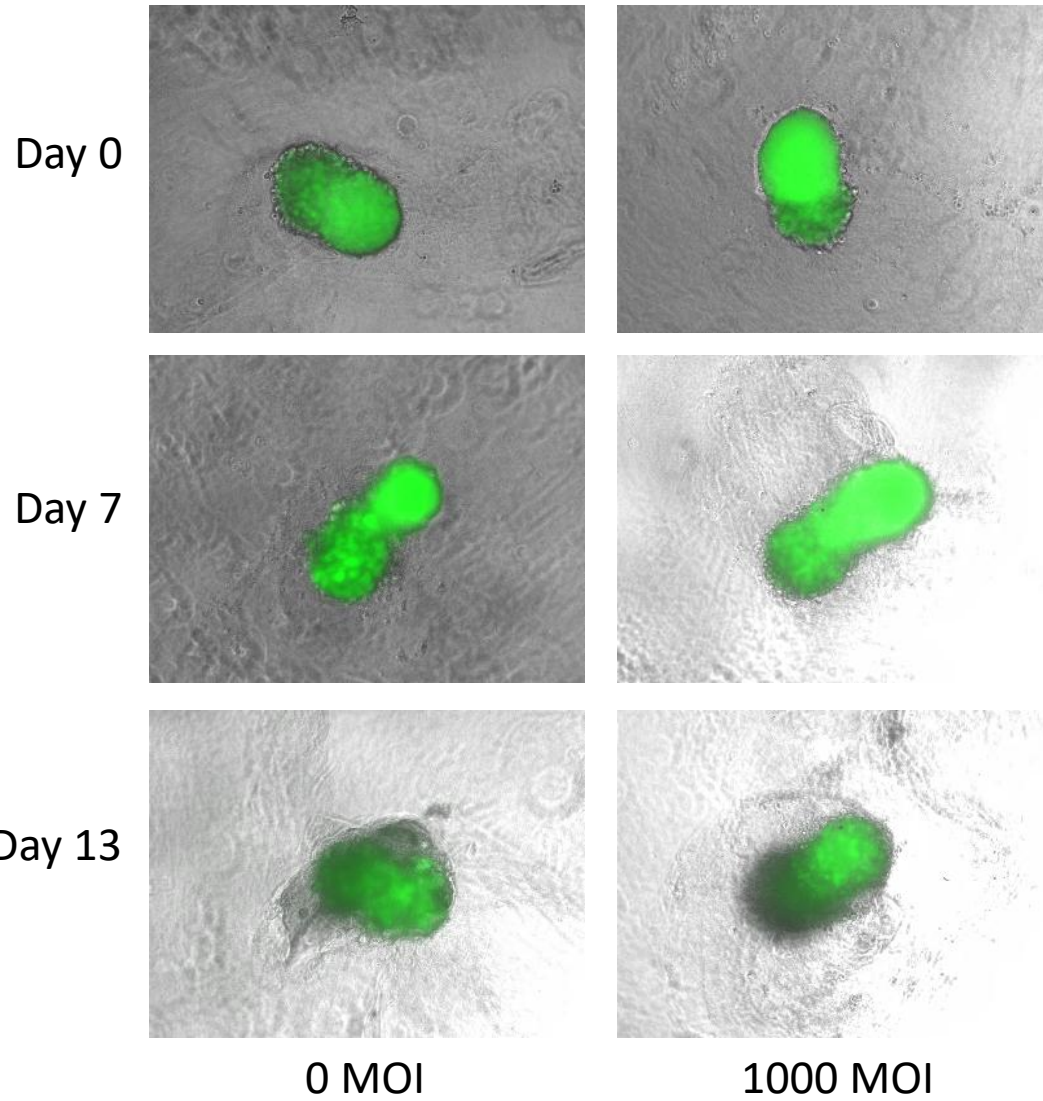

D22 GLP cell lines spheroids were infected with CAV-AU-M3 at MOI 0 and 1000, and the spheroid shrinkage and cytopathic effects were visualized at Day 0, 7, and 13 post-infection by fluorescence microscopy (Keyence) at 10X magnification. This is a representation of three independent experiments.

**Figure S22.**

**MCKOS T1**

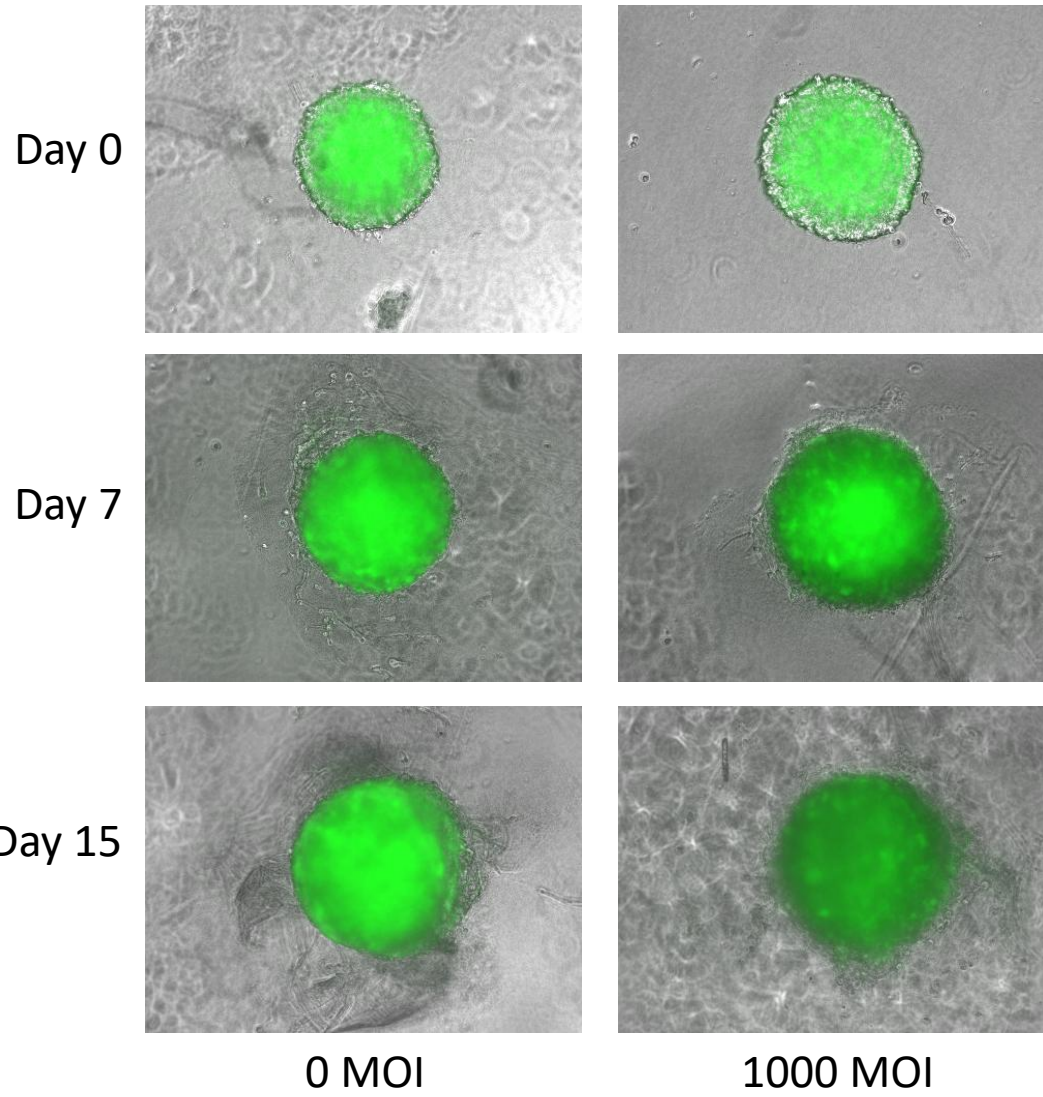

MCKOS cell lines spheroids were infected with CAV-AU-M3 at MOI 0 and 1000, and the spheroid shrinkage and cytopathic effects were visualized at Day 0, 7, and 13 post-infection by fluorescence microscopy (Keyence) at 10X magnification. This is a representation of three independent experiments.

**Figure S23.**

**MCKOS T2**

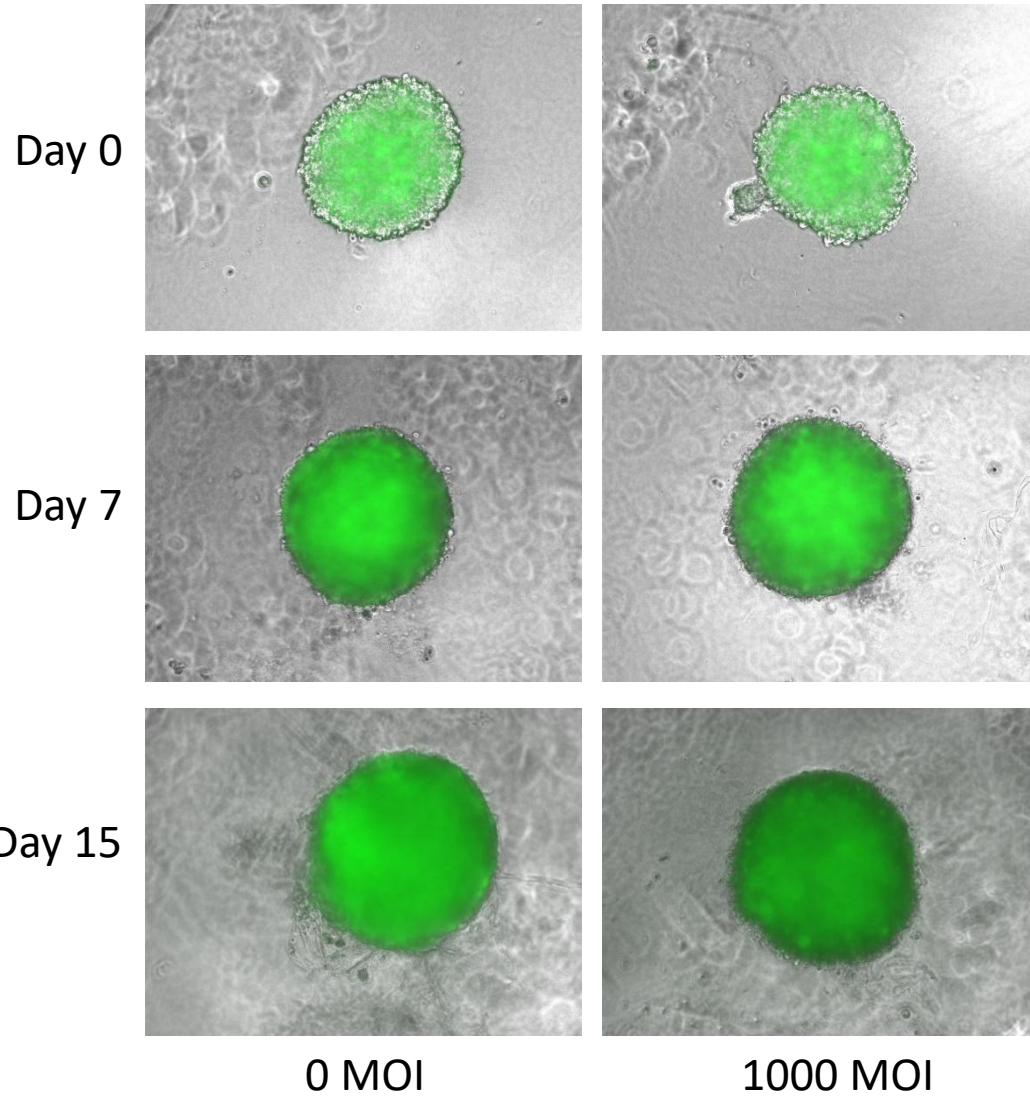

MCKOS cell lines spheroids were infected with CAV-AU-M3 at MOI 0 and 1000, and the spheroid shrinkage and cytopathic effects were visualized at Day 0, 7, and 13 post-infection by fluorescence microscopy (Keyence) at 10X magnification. This is a representation of three independent experiments.

**Figure S23.**

**MCKOS T3**

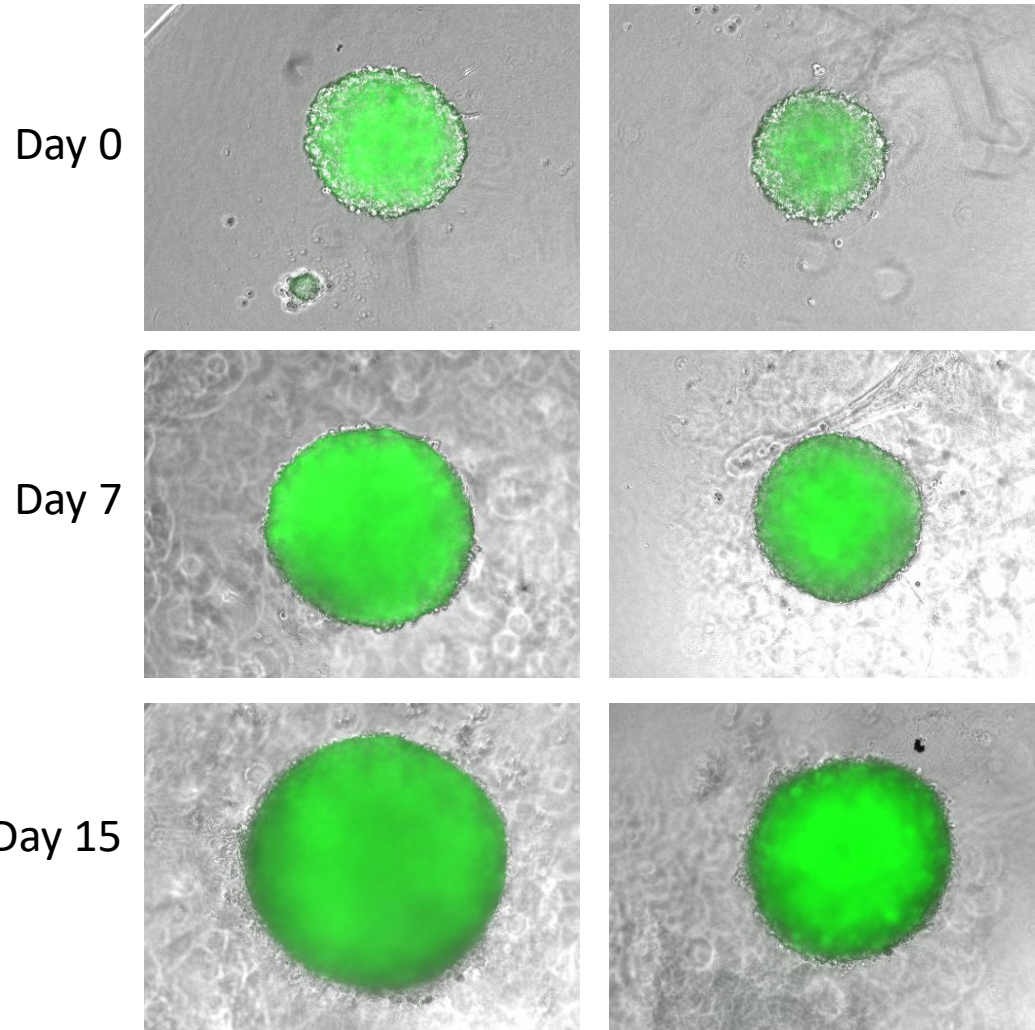

MCKOS cell lines spheroids were infected with CAV-AU-M3 at MOI 0 and 1000, and the spheroid shrinkage and cytopathic effects were visualized at Day 0, 7, and 13 post-infection by fluorescence microscopy (Keyence) at 10X magnification. This is a representation of three independent experiments.

**Figure S24.**

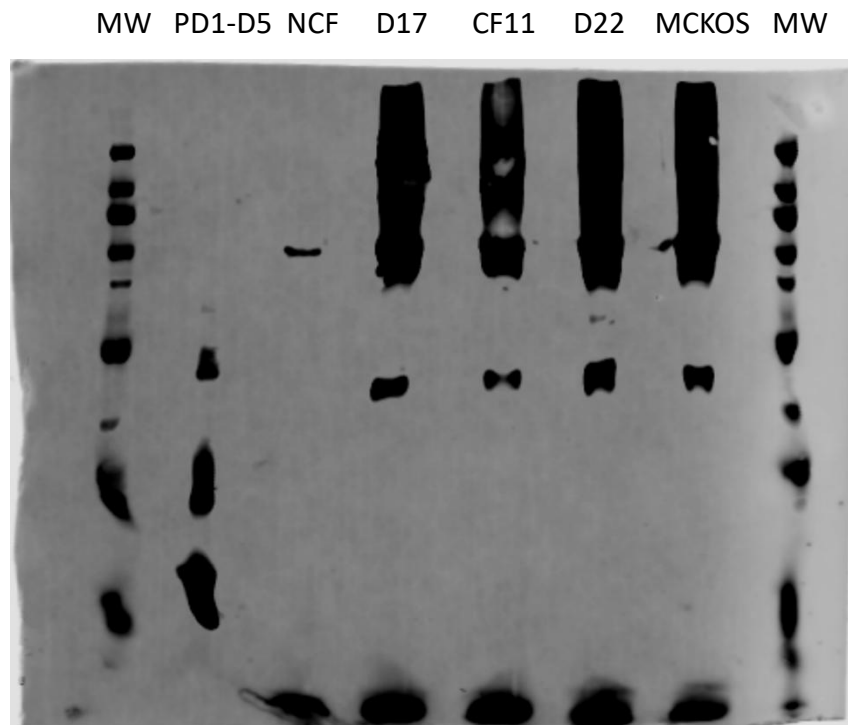

Western blot analysis: anti-PD1 HcAb was isolated from D17 GLP, CF11 GLL, D22 GLP, and MCKOS cell lines. Primary antibody: Mouse Anti-His, secondary antibody: anti mouse IgG

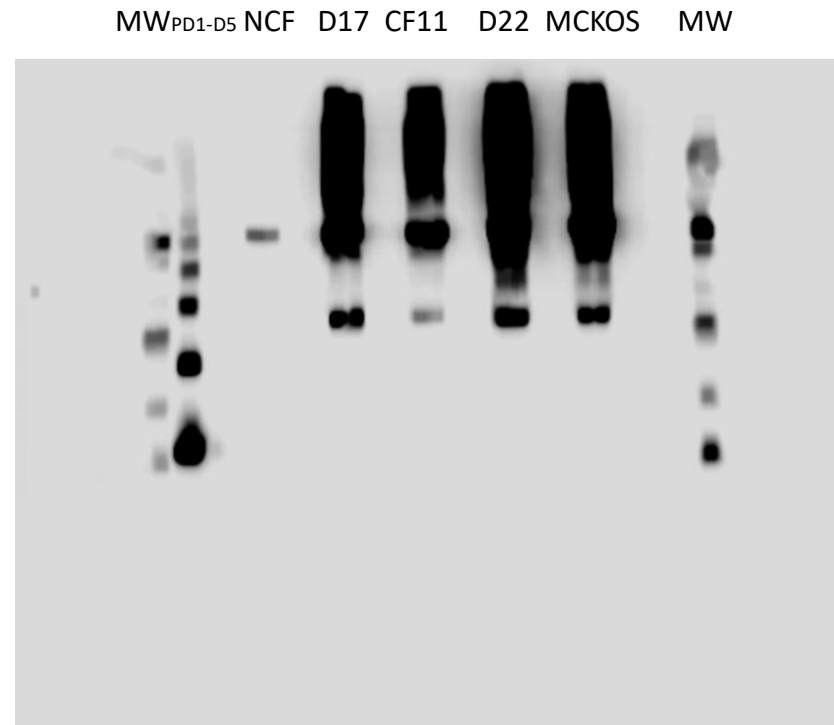

Western blot analysis: anti-PD1 HcAb was isolated from D17 GLP, CF11 GLL, D22 GLP, and MCKOS cell lines. Primary antibody: Mouse anti-VHH IFlour 647
